# Supplementary material
Source: PubMed Central journal article supplement (PMC8545918)

## SUPPLEMENTAL MATERIALS

## Table of Contents

|                                                                                                                                                                                                                                                                                                   |           |
|---------------------------------------------------------------------------------------------------------------------------------------------------------------------------------------------------------------------------------------------------------------------------------------------------|-----------|
| <b>Supplement A. Proportional Hazards Assessment for the Association of Death or MI with INV versus CON in the ISCHEMIA Trials .....</b>                                                                                                                                                          | <b>4</b>  |
| <b>Supplement B. Bayesian Modeling of Heterogeneity of Treatment Effect.....</b>                                                                                                                                                                                                                  | <b>5</b>  |
| <b>Supplement C. Proportional Hazards Assessment for the Associations of Death or MI with DM Exposures of Interest.....</b>                                                                                                                                                                       | <b>7</b>  |
| <b>II. Supplemental Tables.....</b>                                                                                                                                                                                                                                                               | <b>11</b> |
| <b>Table I. Comparison of baseline participant characteristic by study inclusion status. ....</b>                                                                                                                                                                                                 | <b>11</b> |
| <b>Table II. Revascularization in the conservative strategy by diabetes status at baseline... </b>                                                                                                                                                                                                | <b>13</b> |
| <b>Table III. Comparison of participant baseline characteristics by treatment strategy, within subgroups defined by diabetes status at baseline.....</b>                                                                                                                                          | <b>14</b> |
| <b>Table IVa. Comparison of participant baseline characteristics by treatment strategy, within DM-based subgroups for males and females without DM .....</b>                                                                                                                                      | <b>17</b> |
| <b>Table IVb. Comparison of participant baseline characteristics by treatment strategy, within DM-based subgroups for males and females with non-insulin treated DM .....</b>                                                                                                                     | <b>19</b> |
| <b>Table IVc. Comparison of participant baseline characteristics by treatment strategy, within DM-based subgroups for males and females with insulin treated DM.....</b>                                                                                                                          | <b>21</b> |
| <b>Figure Ia. Kaplan-Meier estimate of cumulative event rates of death or MI by diabetes status .....</b>                                                                                                                                                                                         | <b>23</b> |
| <b>Figure Ib. Kaplan-Meier estimate of cumulative event rates of death or MI by clinical features of diabetes .....</b>                                                                                                                                                                           | <b>24</b> |
| <b>Figure Ic. Cumulative incidence of nonprocedural MI (types 1, 2, 4b or 4c) (accounting for competing risks) by diabetes status .....</b>                                                                                                                                                       | <b>25</b> |
| <b>Figure Id. Cumulative incidence of procedural MI (types 4a or 5) (accounting for competing risks) by diabetes status .....</b>                                                                                                                                                                 | <b>26</b> |
| <b>Figure IIa. Comparison of association of death or MI with diabetes status in the ISCHEMIA Trials, ISCHEMIA, and ISCHEMIA-CKD .....</b>                                                                                                                                                         | <b>27</b> |
| <b>Figure IIb. Comparison of the association of death or MI with clinical features of diabetes in the ISCHEMIA Trials, ISCHEMIA, and ISCHEMIA-CKD .....</b>                                                                                                                                       | <b>28</b> |
| <b>Figure IIIa-f. Kaplan-Meier estimate of cumulative event rates of death or MI by treatment strategy, stratified by clinical features of diabetes.....</b>                                                                                                                                      | <b>29</b> |
| <b>Figure IVa. Diabetes and clinical feature-specific treatment effects over study follow-up in the ISCHEMIA trial. Vertical gray bar is the overall treatment effect and the associated gray shading correspond to the 95% credible area. Vertical dashed red bar is at 1 for reference.....</b> | <b>32</b> |
| <b>Figure IVb. Diabetes and clinical feature-specific -specific treatment effects over study follow-up in the ISCHEMIA-CKD trial. Vertical gray bar is the overall treatment effect and</b>                                                                                                       |           |

|                                                                                                                                                                                                                                                                                                                                                                                         |    |
|-----------------------------------------------------------------------------------------------------------------------------------------------------------------------------------------------------------------------------------------------------------------------------------------------------------------------------------------------------------------------------------------|----|
| the associated gray shading correspond to the 95% credible area. Vertical dashed red bar is at 1 for reference. ....                                                                                                                                                                                                                                                                    | 33 |
| Figure V. Summary diabetes and clinical feature-specific treatment effects based on proportional hazards in the ISCHEMIA Trials, ISCHEMIA, and ISCHEMIA-CKD. Vertical gray bar is the overall treatment effect and the associated gray shading correspond to the 95% credible area. Vertical dashed red bar is at 1 for reference.....                                                  | 34 |
| Figure VIa. Kaplan-Meier estimate of cumulative event rates of death by treatment strategy, stratified by diabetes status .....                                                                                                                                                                                                                                                         | 35 |
| Figure VIb. Cumulative incidence of CV death (accounting for competing risks) by treatment strategy, stratified by diabetes status .....                                                                                                                                                                                                                                                | 36 |
| Figure VIc. Cumulative incidence of non-CV death (accounting for competing risks) by treatment strategy, stratified by diabetes status .....                                                                                                                                                                                                                                            | 37 |
| Figure VI d. Cumulative incidence of fatal and non-fatal MI (accounting for competing risks) by treatment strategy, stratified by diabetes status.....                                                                                                                                                                                                                                  | 38 |
| Figure VIIa. Kaplan-Meier estimate of cumulative event rates of death or MI by multivessel CAD $\geq 50\%$ stenosis, stratified by diabetes status.....                                                                                                                                                                                                                                 | 39 |
| Figure VIIb. Kaplan-Meier estimate of cumulative event rates of death or MI by Duke score 6 severity of CAD, stratified by diabetes status .....                                                                                                                                                                                                                                        | 40 |
| Figure VIIc. Kaplan-Meier estimate of cumulative event rates of death or MI by LVSD, stratified by diabetes status.....                                                                                                                                                                                                                                                                 | 41 |
| Figure VIIIa. Kaplan-Meier estimate of cumulative event rates of death or MI by treatment strategy, stratified by diabetes status and multivessel CAD $\geq 50\%$ stenosis.....                                                                                                                                                                                                         | 42 |
| Figure VIIIb. Kaplan-Meier estimate of cumulative event rates of death or MI by treatment strategy, stratified by diabetes status and Duke score 6 severity of CAD.....                                                                                                                                                                                                                 | 43 |
| Figure VIIIc. Kaplan-Meier estimate of cumulative event rates of death or MI by treatment strategy, stratified by diabetes status and LVSD .....                                                                                                                                                                                                                                        | 44 |
| Figure IX. Diabetes anatomic features-specific treatment effects over study follow-up among the subset of ISCHEMIA participants with anatomic features. Color coding is by anatomic feature. Vertical gray bar is the overall treatment effect and the associated gray shading correspond to the 95% credible area. Vertical dashed red bar is at 1 for reference .....                 | 45 |
| Figure X. Summary diabetes anatomic features-specific treatment effects based on proportional hazards among the subset of ISCHEMIA participants with anatomic features. Color coding is by anatomic feature. Vertical gray bar is the overall treatment effect and the associated gray shading correspond to the 95% credible area. Vertical dashed red bar is at 1 for reference ..... | 46 |
| Figure XIa. Kaplan-Meier estimate of cumulative event rates of death by treatment strategy, stratified by diabetes status and multivessel CAD $\geq 50\%$ stenosis.....                                                                                                                                                                                                                 | 47 |
| Figure XIb. Kaplan-Meier estimate of cumulative event rates of death by treatment strategy, stratified by diabetes status and Duke score 6 severity of CAD.....                                                                                                                                                                                                                         | 48 |
| Figure XIc. Kaplan-Meier estimate of cumulative event rates of death by treatment strategy, stratified by diabetes status and LVSD .....                                                                                                                                                                                                                                                | 49 |
| Figure XIIa. Cumulative incidence of CV death (accounting for competing risks) by treatment strategy, stratified by diabetes status and multivessel CAD $\geq 50\%$ stenosis.....                                                                                                                                                                                                       | 50 |

|                                                                                                                                                                                                        |           |
|--------------------------------------------------------------------------------------------------------------------------------------------------------------------------------------------------------|-----------|
| <b>Figure XIIb. Cumulative incidence of CV death (accounting for competing risks) by treatment strategy, stratified by diabetes status and Duke score 6 severity of CAD.....</b>                       | <b>51</b> |
| <b>Figure XIIc. Cumulative incidence of CV death (accounting for competing risks) by treatment strategy, stratified by diabetes status and LVSD .....</b>                                              | <b>52</b> |
| <b>Figure XIIIa. Cumulative incidence of non-CV death (accounting for competing risks) by treatment strategy, stratified by diabetes status and multivessel CAD <math>\geq</math>50% stenosis.....</b> | <b>53</b> |
| <b>Figure XIIIb. Cumulative incidence of non-CV death (accounting for competing risks) by treatment strategy, stratified by diabetes status and Duke score 6 severity of CAD.....</b>                  | <b>54</b> |
| <b>Figure XIIIc. Cumulative incidence of non-CV death (accounting for competing risks) by treatment strategy, stratified by diabetes status and LVSD .....</b>                                         | <b>55</b> |
| <b>Figure XIVa. Cumulative incidence of MI (accounting for competing risks) by treatment strategy, stratified by diabetes status and multivessel CAD <math>\geq</math>50% stenosis.....</b>            | <b>56</b> |
| <b>Figure XIVb. Cumulative incidence of MI (accounting for competing risks) by treatment strategy, stratified by diabetes status and Duke score 6 severity of CAD.....</b>                             | <b>57</b> |
| <b>Figure XIVc. Cumulative incidence of MI (accounting for competing risks) by treatment strategy, stratified by diabetes status and LVSD .....</b>                                                    | <b>58</b> |

## I. Supplemental Methods

### Supplement A. Proportional Hazards Assessment for the Association of Death or MI with INV versus CON in the ISCHEMIA Trials

In the ISCHEMIA trial, the assumption of proportional hazards for the effect of INV versus CON was violated. For this combined trial analysis of death or MI, we evaluated whether the proportional hazards assumption held. We fit a Cox proportional hazards regression model of death or MI with treatment strategy, controlling for the same covariates as in the ISCHEMIA-CKD trial primary analysis.

The score test for the null hypothesis of proportional hazards for treatment strategy was rejected ( $P$ -value=0.0001). Figure A1 presents the time-varying hazard for INV versus CON. Thus, to assess heterogeneity of treatment effect, we used a Bayesian piecewise exponential model that accommodates non-proportional hazards (see **Supplement B**).

**Figure IA.** Scaled Schoenfeld residuals for INV versus CON by log-transformed time

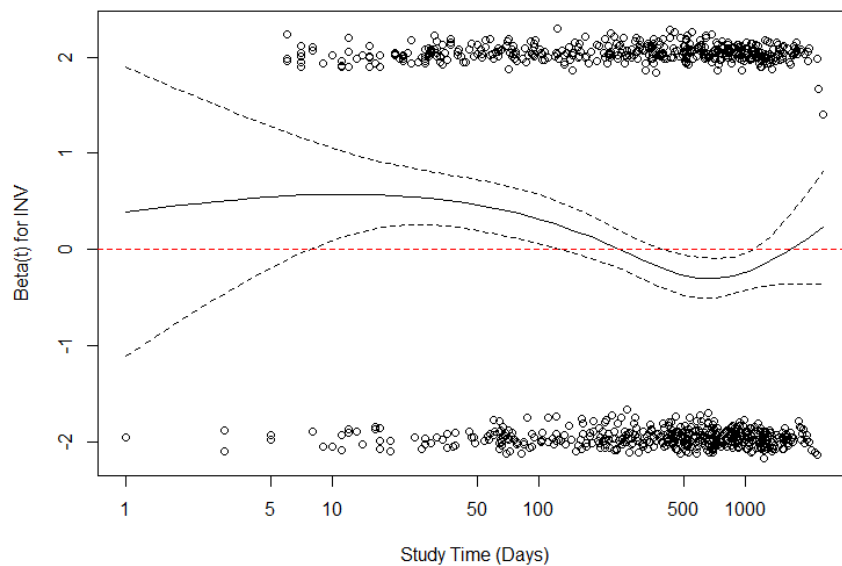

## Supplement B. Bayesian Modeling of Heterogeneity of Treatment Effect

*Statistical model.* We adapted the Dixon Simon<sup>28</sup> model to a Bayesian piecewise exponential non-proportional hazards<sup>48</sup> setting in which the subgroup-specific treatment effects were allowed to vary over follow-up. In the piecewise exponential model, we define  $j = 1, \dots, J$  time intervals to model the piecewise baseline hazard  $h_{0j}(t)$  when follow-up time  $t$  belongs to interval  $j$ . To allow for non-proportional hazards in the subgroup-specific treatment effects, we define treatment-specific time intervals  $s = 1, \dots, S$ . We specify the hazard of death or MI for participant  $i$  ( $i = 1, \dots, n$ ) at  $t$  in time interval  $j$  and treatment-specific interval  $s$  as

$$h_{ijs}(t) = h_{0j}(t) \exp(\mu_{is}),$$

where

$$\mu_{is} = \tau_s \text{INV}_{is} + \gamma_{1s} \text{INV}_{is} \times \text{female}_i + \gamma_{2s} \text{INV}_{is} \times \text{diabetes}_i + \gamma_{3s} \text{INV}_{is} \times \text{diabetes}_i \times \text{insulin}_i + \mathbf{w}_i^T \boldsymbol{\alpha}. \quad (1)$$

In equation (1),  $\text{INV}_{is} = 1$  if participant  $i$  belongs to INV and  $t$  is in time interval  $s$ ; and 0 otherwise. In other words,  $\text{INV}_{is}$  is the interaction between treatment strategy and the time intervals over which we are interested in characterizing the treatment effect. We have relaxed the assumption of proportional hazards by specifying a time-varying coefficient  $\tau_s$  on treatment strategy, and time-varying coefficients  $\gamma_{rs}$  on the interactions between treatment strategy and the participant baseline risk factors ( $r = 1, \dots, R$ ) composing the DM-based subgroups. The  $\mathbf{w}_i$  contains hypothesized confounders of the association between all-cause death/MI and the subgroup-specific treatment effects, with corresponding regression coefficients in  $\boldsymbol{\alpha}$ .

*Prior distributions.* To complete the Bayesian model specification, we assigned the following prior distributions: We assigned independent gamma prior distributions with shape and rate 0.001 for the piecewise baseline hazards  $h_{0j}$ ,<sup>48</sup> and, independent normal prior distributions with mean 0 and variance 100 on  $\tau_s$  and  $\boldsymbol{\alpha}$ . Based on the assumption of exchangeability, for the interaction terms  $\gamma_{rs}$ , we assigned a normal prior distribution with mean 0 and standard deviation  $\sigma$ . For the hierarchical standard deviation  $\sigma$ , we used a truncated normal prior distribution with mean 0 and variance  $A$ . In sensitivity analysis, we examined values of  $A = 1$  and  $A = 25$ .<sup>23,24</sup> Results were robust to the different choices of  $A$ . The main text results are based on the more conservative  $A = 1$ .

*Posterior inferences.* Posterior summaries, including posterior means and 95% credible intervals of the hazard ratio for INV versus CON in each of the six subgroups were computed. We used the model coefficients to estimate the overall treatment effect in the No DM and DM subgroups based on a weighted average approach.<sup>28</sup> Using the DM subgroup as an example, the treatment effect in DM for time interval  $s$  is obtained as a weighted average of the:

1. Treatment effect for diabetes among females with no insulin usage,  $(\tau_s + \gamma_{1s} + \gamma_{2s})$
2. Treatment effect for diabetes among females with insulin usage,  $(\tau_s + \gamma_{1s} + \gamma_{2s} + \gamma_{3s})$
3. Treatment effect for diabetes among males with no insulin usage,  $(\tau_s + \gamma_{2s})$
4. Treatment effect for diabetes among males with insulin usage,  $(\tau_s + \gamma_{2s} + \gamma_{3s})$

The weights are the corresponding relative frequencies of participants with DM who are of a particular sex and insulin status:

5.  $w_{10s}$  is the proportion of diabetes participants surviving in time interval  $s$  who are female with no insulin usage.
6.  $w_{11s}$  is the proportion of diabetes participants surviving in time interval  $s$  who are female with insulin usage.
7.  $w_{00s}$  is the proportion of diabetes participants surviving in time interval  $s$  who are male with no insulin usage.
8.  $w_{01s}$  is the proportion of diabetes participants surviving in time interval  $s$  who are male with insulin usage.

Then, we obtain the treatment effect in the DM subgroup as

$$w_{10s}(\tau_s + \gamma_{1s} + \gamma_{2s}) + w_{11s}(\tau_s + \gamma_{1s} + \gamma_{2s} + \gamma_{3s}) + w_{00s}(\tau_s + \gamma_{2s}) + w_{01s}(\tau_s + \gamma_{2s} + \gamma_{3s}),$$

which simplifies to

$$(\tau_s + \gamma_{2s}) + (w_{10s} + w_{11s})\gamma_{1s} + (w_{01s} + w_{11s})\gamma_{3s}.$$

**Covariates in  $w_i$  and time intervals.** In  $w_i$ , we included age at randomization, dialysis status at baseline, eGFR among non-dialysis participants only, and ejection fraction, in addition to the main effects for sex, diabetes, and diabetes by insulin usage status. For the  $J$  piecewise time intervals for the baseline hazards, we followed the main ISCHEMIA trial primary analysis<sup>10</sup> using 0-14 days; 14-30 days; 30-60 days; 60-90 days; 90-180 days; 180-365 days; 1-1.5 years; 1.5-2 years; 2-2.5 years; 2.5-3 years, 3-3.5 years; 3.5-4 years; 4-5 years, 5-6 years; > 6 years. The  $S$  time intervals to allow the treatment effect to vary over time in years were: <1, 1-2, 2-3, 3-4, 4-5, >5.

**Overall treatment effect in each time interval  $s$ .** To assess whether subgroup-specific treatment effects in each time interval  $s$  represent HTE, we estimated overall treatment effect in each time interval  $s$ . We fit a separate Bayesian piecewise exponential non-proportional hazards model with the same  $J$  piecewise intervals for the baseline hazard and  $S$  intervals for the time-varying treatment effect. In addition to the time-varying treatment effect, we controlled for participant baseline characteristics including DM, DM by insulin treated, sex, age at randomization, dialysis status at baseline, eGFR among non-dialysis participants only, and ejection fraction.

**Model fitting.** Bayesian models were run with 3 chains from dispersed initial values for 200,000 iterations with a burn-in of 100,000. Every 20<sup>th</sup> iteration was saved. Model convergence was assessed visually based on traceplots, and using the Gelman-Rubin diagnostic with convergence indicated by values being below the threshold of 1.1.<sup>49</sup> All analyses were conducted in R<sup>50</sup> and JAGS<sup>51</sup> software programs using the R package R2jags.<sup>52</sup>

## Supplement C. Proportional Hazards Assessment for the Associations of Death or MI with DM Exposures of Interest

Based on separate multivariable Cox proportional hazards regression models for DM versus No DM status and DM-based subgroups, we assessed the assumption of proportional hazards based on the scaled Schoenfeld residuals for each covariate. Each model adjusted for age, treatment strategy, dialysis, eGFR among non-dialysis patients, and ejection fraction. The Cox model for DM versus No DM additionally adjusted for sex. We used a score test to test the null hypothesis of a zero slope – and thus, proportional hazards – in a regression of the scaled Schoenfeld residuals on log transformed time. We used the plots of the hazard for covariates of interest over time to guide testing interaction terms between time and the DM exposures of interest.

Based on the score test, the null hypothesis of proportional hazards for DM versus No DM was not rejected ( $p$ -value=0.4305). Figure C2a shows the time-varying hazard for DM versus now DM by log-transformed time. In the Cox model for DM-based subgroups, the score test rejected the null hypothesis of proportional hazards for non-insulin treated DM Male ( $p$ -value=0.0463); and Insulin treated DM Female ( $p$ -value=0.0120). For Insulin treated DM Male, the  $p$ -value of 0.0643 bordered statistical significance using a five percent significance level. While the plot for the time-varying hazard for non-insulin-treated DM Male appears largely linear, the time-varying hazard plots for Insulin-treated DM Male and Insulin-treated DM Female show some evidence of the magnitude of the hazard distinguished by early versus later follow-up (Figures C2b-d). Therefore, we explore differences using a 180-day cut-off.

**Figure IIA. Scaled Schoenfeld residuals for DM versus No DM by log-transformed time**

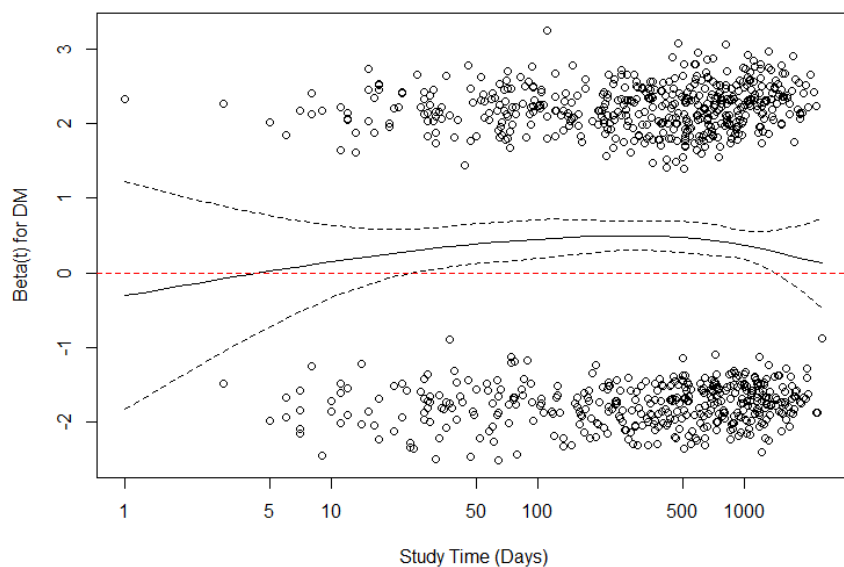

**Figure IIB. Scaled Schoenfeld residuals for non-insulin treated DM male by log-transformed time**

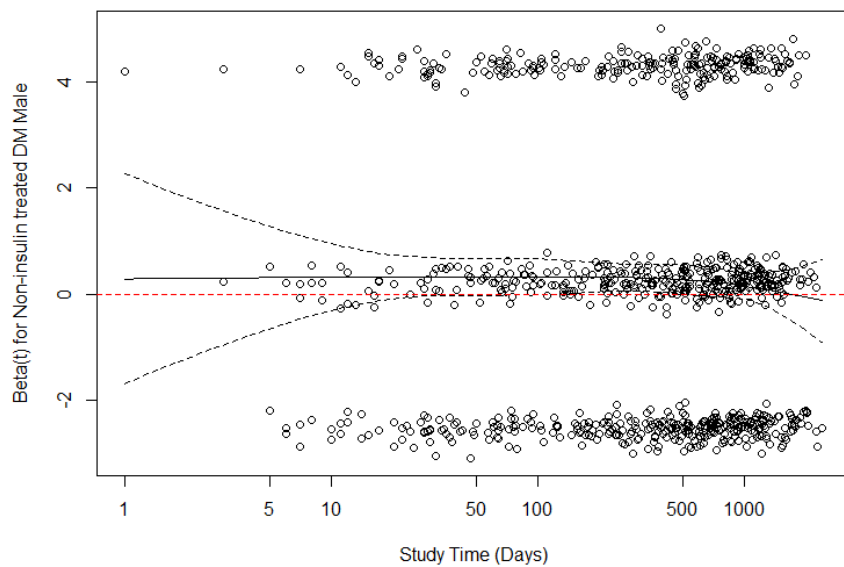

**Figure IIC. Scaled Schoenfeld residuals for insulin treated DM male by log-transformed time**

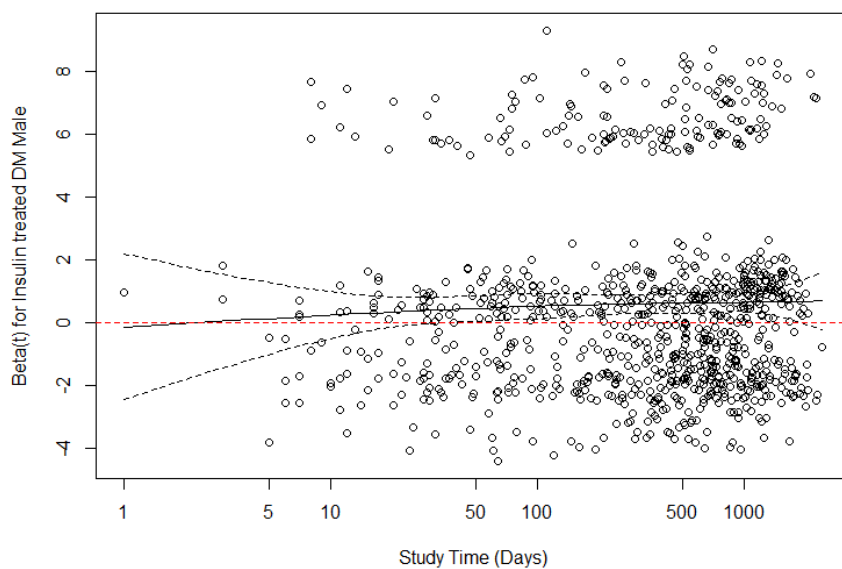



**Figure IID. Scaled Schoenfeld residuals for non-insulin treated DM female by log-transformed time**

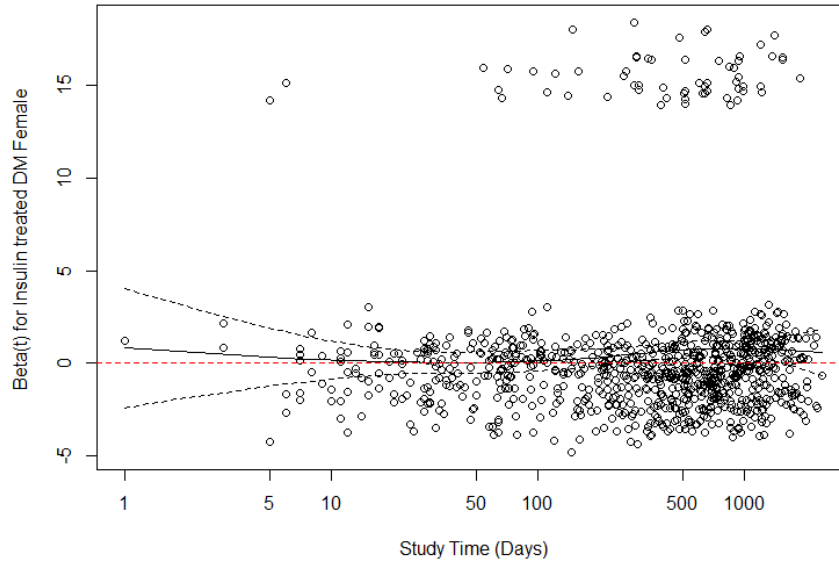

**Table I** presents the estimated hazard ratios for the DM-based subgroups within time interval defined by the 180 day cut-off. Compared to the reference level of males without DM, both insulin treated DM male and insulin treated DM female appear to have hazard ratios of greater magnitude in the post 180 day period versus the pre 180 day period.

**Table I.** Adjusted hazard ratios from a Cox non-proportional hazards model for the association of death or MI with DM-based subgroups in time intervals according to a 180-day cut off.<sup>\*,†</sup>

| Cox Model for DM-based subgroups |                   |                   |
|----------------------------------|-------------------|-------------------|
|                                  | Before 180 days   | After 180 days    |
|                                  | HR (95% CI)       | HR (95% CI)       |
| No DM Male                       | Ref               | Ref               |
| No DM Female                     | 0.82 (0.53, 1.27) | 0.81 (0.61, 1.08) |
| Non-insulin treated DM Male      | 1.39 (1.02, 1.88) | 1.23 (1.00, 1.51) |
| Non-insulin treated DM Female    | 1.22 (0.73, 2.02) | 1.19 (0.86, 1.65) |
| Insulin treated DM Male          | 1.39 (0.96, 2.02) | 2.00 (1.58, 2.52) |
| Insulin treated DM Female        | 0.97 (0.53, 1.77) | 2.04 (1.49, 2.78) |

\*The Cox non-proportional hazards model adjusted for age, treatment strategy, dialysis, eGFR among non-dialysis patients, and ejection fraction.

†The cut-off of 180 days was selected based on Figures C2b-d, which show some evidence of the magnitude of the hazard distinguished by early versus later follow-up.

## II. Supplemental Tables

Table I. Comparison of baseline participant characteristic by study inclusion status.

| Characteristic                                      | All Participants<br>(N=5,956) | Excluded<br>(N=56) | Included<br>(N=5,900) |
|-----------------------------------------------------|-------------------------------|--------------------|-----------------------|
| <b>Demographics</b>                                 |                               |                    |                       |
| Age at Randomization (years)                        |                               |                    |                       |
| N                                                   | 5956                          | 56                 | 5900                  |
| Median (Q1, Q3)                                     | 64 (57, 70)                   | 63 (54, 69)        | 64 (57, 70)           |
| Gender                                              |                               |                    |                       |
| Female                                              | 1,410/5,956 (23.7%)           | 16/56 (28.6%)      | 1,394/5,900 (23.6%)   |
| Race                                                |                               |                    |                       |
| American Indian or Alaskan Native                   | 18/5,876 (0.3%)               | 0/56 (0.0%)        | 18/5,820 (0.3%)       |
| Asian                                               | 1,676/5,876 (28.5%)           | 29/56 (51.8%)      | 1,647/5,820 (28.3%)   |
| Native Hawaiian or Other Pacific Islander           | 18/5,876 (0.3%)               | 2/56 (3.6%)        | 16/5,820 (0.3%)       |
| Black or African American                           | 267/5,876 (4.5%)              | 2/56 (3.6%)        | 265/5,820 (4.6%)      |
| White                                               | 3,884/5,876 (66.1%)           | 23/56 (41.1%)      | 3,861/5,820 (66.3%)   |
| Multiple Races Reported                             | 13/5,876 (0.2%)               | 0/56 (0.0%)        | 13/5,820 (0.2%)       |
| Ethnicity                                           |                               |                    |                       |
| Hispanic or Latino                                  | 861/5,550 (15.5%)             | 3/54 (5.6%)        | 858/5,496 (15.6%)     |
| Diabetes                                            | 2,608/5,956 (43.8%)           | 55/56 (98.2%)      | 2,553/5,900 (43.3%)   |
| Diabetes Treatment                                  |                               |                    |                       |
| Insulin Treated                                     | 772/2,554 (30.2%)             | 1/55 (1.8%)        | 771/2,553 (30.2%)     |
| Non-Insulin Diabetes Medication                     | 1,447/2,554 (56.7%)           | 0/55 (0.0%)        | 1,447/2,553 (56.7%)   |
| None/Diet Controlled                                | 335/2,554 (13.1%)             | 0/55 (0.0%)        | 335/2,553 (13.1%)     |
| Unknown                                             | 0/2,554 (0.0%)                | 54/55 (98.2%)      | 0/2,553 (0.0%)        |
| Cigarette Smoking                                   |                               |                    |                       |
| Never Smoked                                        | 2,579/5,951 (43.3%)           | 24/56 (42.9%)      | 2,555/5,895 (43.3%)   |
| Former Smoker                                       | 2,648/5,951 (44.5%)           | 22/56 (39.3%)      | 2,626/5,895 (44.5%)   |
| Current Smoker                                      | 724/5,951 (12.2%)             | 10/56 (17.9%)      | 714/5,895 (12.1%)     |
| <b>Clinical History</b>                             |                               |                    |                       |
| Hypertension                                        | 4,500/5,934 (75.8%)           | 38/56 (67.9%)      | 4,462/5,878 (75.9%)   |
| Baseline Hemoglobin A1c                             |                               |                    |                       |
| N                                                   | 3910                          | 54                 | 3856                  |
| Median (Q1, Q3)                                     | 6 (6, 8)                      | 7 (7, 7)           | 6 (6, 8)              |
| Family History of Premature Coronary Heart Disease  | 1,282/5,127 (25.0%)           | 16/52 (30.8%)      | 1,266/5,075 (24.9%)   |
| Prior Myocardial Infarction                         | 1,124/5,938 (18.9%)           | 15/56 (26.8%)      | 1,109/5,882 (18.9%)   |
| Prior Percutaneous Coronary Intervention (PCI)      | 1,196/5,952 (20.1%)           | 13/56 (23.2%)      | 1,183/5,896 (20.1%)   |
| Prior Coronary Artery Bypass Graft (CABG)           | 231/5,956 (3.9%)              | 2/56 (3.6%)        | 229/5,900 (3.9%)      |
| Prior MI or Prior PCI or Prior CABG                 | 1,794/5,938 (30.2%)           | 19/56 (33.9%)      | 1,775/5,882 (30.2%)   |
| On Dialysis Status at Baseline                      | 416/5,954 (7.0%)              | 1/54 (1.9%)        | 415/5,900 (7.0%)      |
| eGFR among Patients not on Dialysis at Baseline     |                               |                    |                       |
| N                                                   | 5538                          | 53                 | 5485                  |
| Median (Q1, Q3)                                     | 80 (64, 95)                   | 81 (66, 103)       | 80 (64, 95)           |
| eGFR ml/min/1.73 m <sup>2</sup>                     |                               |                    |                       |
| ≥60                                                 | 4,440/5,956 (74.5%)           | 44/56 (78.6%)      | 4,396/5,900 (74.5%)   |
| Between 30 to 59                                    | 740/5,956 (12.4%)             | 5/56 (8.9%)        | 735/5,900 (12.5%)     |
| Less than 30 or on dialysis                         | 776/5,956 (13.0%)             | 7/56 (12.5%)       | 769/5,900 (13.0%)     |
| <b>Non-Cardiac Vascular and Comorbidity History</b> |                               |                    |                       |

| Characteristic                                                                                          | All Participants<br>(N=5,956) | Excluded<br>(N=56) | Included<br>(N=5,900) |
|---------------------------------------------------------------------------------------------------------|-------------------------------|--------------------|-----------------------|
| Prior Carotid Artery Surgery or Stent, Stroke, or Transient Ischemic Attack (TIA)                       | 477/5,941 (8.0%)              | 3/54 (5.6%)        | 474/5,887 (8.1%)      |
| Prior Stroke                                                                                            | 219/5,955 (3.7%)              | 2/56 (3.6%)        | 217/5,899 (3.7%)      |
| Prior Peripheral Vascular Disease (PAD) or Surgery or Percutaneous Procedure for PAD                    | 252/5,945 (4.2%)              | 2/54 (3.7%)        | 250/5,891 (4.2%)      |
| <b>Angina History</b>                                                                                   |                               |                    |                       |
| Baseline Seattle Angina Questionnaire Angina Frequency Scale                                            |                               |                    |                       |
| N                                                                                                       | 5,371                         | 48                 | 5,323                 |
| Median (25th, 75th)                                                                                     | 90 (70, 100)                  | 90 (75, 100)       | 90 (70, 100)          |
| Baseline Seattle Angina Questionnaire Angina Frequency Scale                                            |                               |                    |                       |
| Daily Angina (0-30)                                                                                     | 128/5,371 (2.4%)              | 1/48 (2.1%)        | 127/5,323 (2.4%)      |
| Weekly Angina (31-60)                                                                                   | 906/5,371 (16.9%)             | 6/48 (12.5%)       | 900/5,323 (16.9%)     |
| Monthly Angina (61-99)                                                                                  | 2,340/5,371 (43.6%)           | 18/48 (37.5%)      | 2,322/5,323 (43.6%)   |
| No Angina in Past Month (100)                                                                           | 1,997/5,371 (37.2%)           | 23/48 (47.9%)      | 1,974/5,323 (37.1%)   |
| Participant Has Ever Had Angina                                                                         | 5,225/5,956 (87.7%)           | 46/56 (82.1%)      | 5,179/5,900 (87.8%)   |
| New Onset of Angina Over the Past 3 Months                                                              | 976/5,666 (17.2%)             | 10/56 (17.9%)      | 966/5,610 (17.2%)     |
| Angina Began or Became More Frequent Over the Past 3 Months                                             | 1,500/5,209 (28.8%)           | 12/46 (26.1%)      | 1,488/5,163 (28.8%)   |
| Left ventricular systolic dysfunction (35%≤EF<45%)                                                      | 310/5,951 (5.2%)              | 4/56 (7%)          | 306/5,895 (5%)        |
| Ejection Fraction*                                                                                      |                               |                    |                       |
| N                                                                                                       | 5,256                         | 50                 | 5,206                 |
| Median (25th, 75th)                                                                                     | 60 (55, 65)                   | 62 (59, 67)        | 60 (55, 65)           |
| Site-reported value, if available. If not available, then core-lab entered value. EF, ejection fraction |                               |                    |                       |

Table II. Revascularization in the conservative strategy by diabetes status at baseline

|                                                          | <b>All Participants in CON strategy (N=2,955)</b> | <b>No Diabetes at Baseline (n=1,668)</b> | <b>Diabetes at Baseline (n=1,287)</b> | <b>P-value</b> |
|----------------------------------------------------------|---------------------------------------------------|------------------------------------------|---------------------------------------|----------------|
| Overall Revascularization, n (%)                         | 615/2955 (20.8%)                                  | 327/1668 (19.6%)                         | 288/1287 (22.4%)                      | 0.0726         |
| PCI                                                      | 425/615 (69.1%)                                   | 228/327 (69.7%)                          | 197/288 (68.4%)                       |                |
| CABG                                                     | 190/615 (30.9%)                                   | 99/327 (30.3%)                           | 91/288 (31.6%)                        |                |
| Revascularization not preceded by a Primary event, n (%) | 486/2955 (16.4%)                                  | 270/1668 (16.2%)                         | 216/1287 (16.8%)                      | 0.7014         |
| PCI                                                      | 344/486 (70.8%)                                   | 190/270 (70.4%)                          | 154/216 (71.3%)                       |                |
| CABG                                                     | 142/486 (29.2%)                                   | 80/270 (29.6%)                           | 62/216 (28.7%)                        |                |
| Revascularization preceded by a Primary event, n (%)     | 129/2955 (4.4%)                                   | 57/1668 (3.4%)                           | 72/1287 (5.6%)                        | 0.0054         |
| PCI                                                      | 81/129 (62.8%)                                    | 38/57 (66.7%)                            | 43/72 (59.7%)                         |                |
| CABG                                                     | 48/129 (37.2%)                                    | 19/57 (33.3%)                            | 29/72 (40.3%)                         |                |

Table III. Comparison of participant baseline characteristics by treatment strategy, within subgroups defined by diabetes status at baseline

| Characteristic                                 | All Participants without Diabetes at Baseline<br>(N=3,347) |                        | P-value | All Participants with Diabetes<br>(N=2,553) |                        | P-value |
|------------------------------------------------|------------------------------------------------------------|------------------------|---------|---------------------------------------------|------------------------|---------|
|                                                | INV<br>(N=1,679)                                           | CON<br>(N=1,668)       |         | INV<br>(N=1,266)                            | CON<br>(N=1,287)       |         |
| <b>Demographics</b>                            |                                                            |                        |         |                                             |                        |         |
| Age at Randomization (yrs)                     |                                                            |                        | 0.437   |                                             |                        | 0.398   |
| N                                              | 1679                                                       | 1668                   |         | 1266                                        | 1287                   |         |
| Median (Q1, Q3)                                | 64 (57, 71)                                                | 64 (57, 71)            |         | 64 (58, 70)                                 | 64 (58, 70)            |         |
| Gender                                         |                                                            |                        | 0.727   |                                             |                        | 0.166   |
| Female                                         | 388/1,679<br>(23.1%)                                       | 377/1,668<br>(22.6%)   |         | 327/1,266<br>(25.8%)                        | 302/1,287<br>(23.5%)   |         |
| Race                                           |                                                            |                        | 0.603   |                                             |                        | 0.587   |
| American Indian or Alaskan Native              | 7/1,669 (0.4%)                                             | 2/1,649 (0.1%)         |         | 3/1,242 (0.2%)                              | 6/1,260 (0.5%)         |         |
| Asian                                          | 424/1,669<br>(25.4%)                                       | 413/1,649<br>(25.0%)   |         | 399/1,242<br>(32.1%)                        | 411/1,260<br>(32.6%)   |         |
| Native Hawaiian or Other Pacific Islander      | 2/1,669 (0.1%)                                             | 4/1,649 (0.2%)         |         | 3/1,242 (0.2%)                              | 7/1,260 (0.6%)         |         |
| Black or African American                      | 51/1,669 (3.1%)                                            | 52/1,649 (3.2%)        |         | 77/1,242 (6.2%)                             | 85/1,260 (6.7%)        |         |
| White                                          | 1,181/1,669<br>(70.8%)                                     | 1,175/1,649<br>(71.3%) |         | 756/1,242<br>(60.9%)                        | 749/1,260<br>(59.4%)   |         |
| Multiple Races Reported                        | 4/1,669 (0.2%)                                             | 3/1,649 (0.2%)         |         | 4/1,242 (0.3%)                              | 2/1,260 (0.2%)         |         |
| Ethnicity                                      |                                                            |                        | 0.189   |                                             |                        | 0.326   |
| Hispanic or Latino                             | 212/1,582<br>(13.4%)                                       | 235/1,563<br>(15.0%)   |         | 212/1,161<br>(18.3%)                        | 199/1,190<br>(16.7%)   |         |
| Diabetes Treatment                             |                                                            |                        |         |                                             |                        | 0.877   |
| Insulin Treated                                | -                                                          | -                      |         | 377/1,266<br>(29.8%)                        | 394/1,287<br>(30.6%)   |         |
| Non-Insulin Diabetes Medication                | -                                                          | -                      |         | 720/1,266<br>(56.9%)                        | 727/1,287<br>(56.5%)   |         |
| None/Diet Controlled                           | -                                                          | -                      |         | 169/1,266<br>(13.3%)                        | 166/1,287<br>(12.9%)   |         |
| Cigarette Smoking                              |                                                            |                        |         |                                             |                        | 0.241   |
| Never Smoked                                   | 684/1,679<br>(40.7%)                                       | 692/1,666<br>(41.5%)   |         | 606/1,265<br>(47.9%)                        | 573/1,285<br>(44.6%)   |         |
| Former Smoker                                  | 754/1,679<br>(44.9%)                                       | 746/1,666<br>(44.8%)   |         | 540/1,265<br>(42.7%)                        | 586/1,285<br>(45.6%)   |         |
| Current Smoker                                 | 241/1,679<br>(14.4%)                                       | 228/1,666<br>(13.7%)   |         | 119/1,265 (9.4%)                            | 126/1,285 (9.8%)       |         |
| <b>Clinical History</b>                        |                                                            |                        |         |                                             |                        |         |
| Hypertension                                   | 1,185/1,671<br>(70.9%)                                     | 1,172/1,660<br>(70.6%) | 0.842   | 1,036/1,263<br>(82.0%)                      | 1,069/1,284<br>(83.3%) | 0.413   |
| Baseline Hemoglobin % A1c                      |                                                            |                        | 0.108   |                                             |                        | 0.040   |
| N                                              | 770                                                        | 756                    |         | 1159                                        | 1171                   |         |
| Median (Q1, Q3)                                | 6 (6, 6)                                                   | 6 (5, 6)               |         | 7 (7, 8)                                    | 7 (7, 8)               |         |
| Prior Myocardial Infarction                    | 312/1,675<br>(18.6%)                                       | 306/1,663<br>(18.4%)   | 0.866   | 238/1,261<br>(18.9%)                        | 253/1,283<br>(19.7%)   | 0.589   |
| Prior Percutaneous Coronary Intervention (PCI) | 326/1,678<br>(19.4%)                                       | 316/1,666<br>(19.0%)   | 0.735   | 292/1,265<br>(23.1%)                        | 249/1,287<br>(19.3%)   | 0.021   |
| Prior Coronary Artery Bypass Graft (CABG)      | 57/1,679 (3.4%)                                            | 53/1,668 (3.2%)        | 0.724   | 66/1,266 (5.2%)                             | 53/1,287 (4.1%)        | 0.189   |

| Characteristic                                                                    | All Participants without Diabetes at Baseline<br>(N=3,347) |                        |         | All Participants with Diabetes<br>(N=2,553) |                        |         |
|-----------------------------------------------------------------------------------|------------------------------------------------------------|------------------------|---------|---------------------------------------------|------------------------|---------|
|                                                                                   | INV<br>(N=1,679)                                           | CON<br>(N=1,668)       | P-value | INV<br>(N=1,266)                            | CON<br>(N=1,287)       | P-value |
| Prior MI or Prior PCI or Prior CABG                                               | 483/1,675<br>(28.8%)                                       | 483/1,662<br>(29.1%)   | 0.886   | 419/1,261<br>(33.2%)                        | 390/1,284<br>(30.4%)   | 0.122   |
| eGFR among Patients not on Dialysis at Baseline                                   |                                                            |                        | 0.779   |                                             |                        | 0.736   |
| N                                                                                 | 1589                                                       | 1564                   |         | 1159                                        | 1173                   |         |
| Median (Q1, Q3)                                                                   | 81 (67, 96)                                                | 81 (66, 96)            |         | 78 (59, 94)                                 | 78 (60, 94)            |         |
| EGFR ml/min/1.73 m2                                                               |                                                            |                        | 0.414   |                                             |                        | 0.884   |
| Greater than 60                                                                   | 1,319/1,679<br>(78.6%)                                     | 1,323/1,668<br>(79.3%) |         | 864/1,266<br>(68.2%)                        | 890/1,287<br>(69.2%)   |         |
| Between 30 to 59                                                                  | 198/1,679<br>(11.8%)                                       | 174/1,668<br>(10.4%)   |         | 183/1,266<br>(14.5%)                        | 180/1,287<br>(14.0%)   |         |
| Less than 30 or on dialysis                                                       | 162/1,679 (9.6%)                                           | 171/1,668<br>(10.3%)   |         | 219/1,266<br>(17.3%)                        | 217/1,287<br>(16.9%)   |         |
| On Dialysis at Baseline                                                           | 90/1,679 (5.4%)                                            | 104/1,668 (6.2%)       | 0.279   | 107/1,266 (8.5%)                            | 114/1,287 (8.9%)       | 0.715   |
| <b>Non-Cardiac Vascular and Comorbidity History</b>                               |                                                            |                        |         |                                             |                        |         |
| Prior Carotid Artery Surgery or Stent, Stroke, or Transient Ischemic Attack (TIA) | 126/1,676 (7.5%)                                           | 106/1,664 (6.4%)       | 0.192   | 125/1,263 (9.9%)                            | 117/1,284 (9.1%)       | 0.499   |
| Prior Stroke                                                                      | 55/1,678 (3.3%)                                            | 37/1,668 (2.2%)        | 0.061   | 63/1,266 (5.0%)                             | 62/1,287 (4.8%)        | 0.852   |
| Prior Surgery or Percutaneous Procedure for PAD                                   | 66/1,677 (3.9%)                                            | 47/1,666 (2.8%)        | 0.075   | 74/1,265 (5.8%)                             | 63/1,283 (4.9%)        | 0.293   |
| <b>Angina History</b>                                                             |                                                            |                        |         |                                             |                        |         |
| Baseline Seattle Angina Questionnaire Angina Frequency Scale                      |                                                            |                        | 0.197   |                                             |                        | 0.062   |
| N                                                                                 | 1,535                                                      | 1,544                  |         | 1,111                                       | 1,133                  |         |
| Median (25th, 75th)                                                               | 90 (70, 100)                                               | 90 (70, 100)           |         | 90 (70, 100)                                | 90 (70, 100)           |         |
| Baseline Seattle Angina Questionnaire Angina Frequency Scale                      |                                                            |                        | 0.557   |                                             |                        | 0.255   |
| Daily Angina (0-30)                                                               | 39/1,535 (2.5%)                                            | 33/1,544 (2.1%)        |         | 29/1,111 (2.6%)                             | 26/1,133 (2.3%)        |         |
| Weekly Angina (31-60)                                                             | 288/1,535<br>(18.8%)                                       | 265/1,544<br>(17.2%)   |         | 186/1,111<br>(16.7%)                        | 161/1,133<br>(14.2%)   |         |
| Monthly Angina (61-99)                                                            | 670/1,535<br>(43.6%)                                       | 697/1,544<br>(45.1%)   |         | 475/1,111<br>(42.8%)                        | 480/1,133<br>(42.4%)   |         |
| No Angina in Past Month (100)                                                     | 538/1,535<br>(35.0%)                                       | 549/1,544<br>(35.6%)   |         | 421/1,111<br>(37.9%)                        | 466/1,133<br>(41.1%)   |         |
| Participant Has Ever Had Angina                                                   | 1,508/1,679<br>(89.8%)                                     | 1,476/1,668<br>(88.5%) | 0.180   | 1,084/1,266<br>(85.6%)                      | 1,111/1,287<br>(86.3%) | 0.608   |
| New Onset of Angina Over the Past 3 Months                                        | 283/1,593<br>(17.8%)                                       | 287/1,581<br>(18.2%)   | 0.776   | 183/1,203<br>(15.2%)                        | 213/1,233<br>(17.3%)   | 0.168   |
| Left ventricular systolic dysfunction (35%≤EF<45%)                                | 67/1,678 (4.0%)                                            | 82/1,666 (4.9%)        | 0.223   | 87/1,265 (6.9%)                             | 70/1,286 (5.4%)        | 0.154   |
| Ejection Fraction*                                                                |                                                            |                        | 0.307   |                                             |                        | 0.406   |
| N                                                                                 | 1,490                                                      | 1,454                  |         | 1,122                                       | 1,140                  |         |
| Median (25th, 75th)                                                               | 60 (55, 65)                                                | 60 (55, 65)            |         | 60 (54, 65)                                 | 60 (54, 65)            |         |
| <b>Optimal Medical Therapy†</b>                                                   |                                                            |                        |         |                                             |                        |         |

| Characteristic                                      | All Participants without Diabetes at Baseline<br>(N=3,347) |                        |         | All Participants with Diabetes<br>(N=2,553) |                        |         |
|-----------------------------------------------------|------------------------------------------------------------|------------------------|---------|---------------------------------------------|------------------------|---------|
|                                                     | INV<br>(N=1,679)                                           | CON<br>(N=1,668)       | P-value | INV<br>(N=1,266)                            | CON<br>(N=1,287)       | P-value |
| LDL cholesterol < 70 mg/dL<br>and on any statin     | 440/1,600<br>(27.5%)                                       | 421/1,601<br>(26.3%)   | 0.442   | 462/1,193<br>(38.7%)                        | 492/1,221<br>(40.3%)   | 0.431   |
| Systolic blood pressure < 140<br>mmHg               | 1,108/1,668<br>(66.4%)                                     | 1,132/1,663<br>(68.1%) | 0.312   | 730/1,261<br>(57.9%)                        | 783/1,281<br>(61.1%)   | 0.097   |
| Aspirin or other anti-platelet or<br>anti-coagulant | 1,600/1,677<br>(95.4%)                                     | 1,565/1,668<br>(93.8%) | 0.042   | 1,199/1,266<br>(94.7%)                      | 1,215/1,286<br>(94.5%) | 0.798   |
| Non smoker                                          | 1,438/1,679<br>(85.6%)                                     | 1,438/1,666<br>(86.3%) | 0.578   | 1,146/1,265<br>(90.6%)                      | 1,159/1,285<br>(90.2%) | 0.733   |

Site-reported value, if available. If not available, then core-lab entered value. EF, ejection fraction  
<sup>†</sup>ISCHEMIA definition of optimal medical therapy<sup>11</sup>



Table IVa. Comparison of participant baseline characteristics by treatment strategy, within DM-based subgroups for males and females without DM

| Characteristic                                  | No DM Male<br>(N=2,582) |                     | P-value | No DM Female<br>(N=765) |                 | P-value |
|-------------------------------------------------|-------------------------|---------------------|---------|-------------------------|-----------------|---------|
|                                                 | INV<br>(N=1,291)        | CON<br>(N=1,291)    |         | INV<br>(N=388)          | CON<br>(N=377)  |         |
| <b>Demographics</b>                             |                         |                     |         |                         |                 |         |
| Age at Randomization (yrs)                      |                         |                     | 0.131   |                         |                 | 0.248   |
| N                                               | 1291                    | 1291                |         | 388                     | 377             |         |
| Median (Q1, Q3)                                 | 64 (57, 71)             | 63 (56, 70)         |         | 64 (59, 71)             | 65 (58, 72)     |         |
| Race                                            |                         |                     | 0.567   |                         |                 | 0.552   |
| American Indian or Alaskan Native               | 5/1,281 (0.4%)          | 1/1,280 (0.1%)      |         | 2/388 (0.5%)            | 1/369 (0.3%)    |         |
| Asian                                           | 339/1,281 (26.5%)       | 344/1,280 (26.9%)   |         | 85/388 (21.9%)          | 69/369 (18.7%)  |         |
| Native Hawaiian or Other Pacific Islander       | 2/1,281 (0.2%)          | 4/1,280 (0.3%)      |         | 0/388 (0.0%)            | 0/377 (0.0%)    |         |
| Black or African American                       | 35/1,281 (2.7%)         | 40/1,280 (3.1%)     |         | 16/388 (4.1%)           | 12/369 (3.3%)   |         |
| White                                           | 896/1,281 (69.9%)       | 888/1,280 (69.4%)   |         | 285/388 (73.5%)         | 287/369 (77.8%) |         |
| Multiple Races Reported                         | 4/1,281 (0.3%)          | 3/1,280 (0.2%)      |         | 0/388 (0.0%)            | 0/377 (0.0%)    |         |
| Ethnicity                                       |                         |                     | 0.367   |                         |                 | 0.277   |
| Hispanic or Latino                              | 166/1,216 (13.7%)       | 181/1,212 (14.9%)   |         | 46/366 (12.6%)          | 54/351 (15.4%)  |         |
| Cigarette Smoking                               |                         |                     | 0.735   |                         |                 | 0.850   |
| Never Smoked                                    | 449/1,291 (34.8%)       | 459/1,289 (35.6%)   |         | 235/388 (60.6%)         | 233/377 (61.8%) |         |
| Former Smoker                                   | 641/1,291 (49.7%)       | 643/1,289 (49.9%)   |         | 113/388 (29.1%)         | 103/377 (27.3%) |         |
| Current Smoker                                  | 201/1,291 (15.6%)       | 187/1,289 (14.5%)   |         | 40/388 (10.3%)          | 41/377 (10.9%)  |         |
| <b>Clinical History</b>                         |                         |                     |         |                         |                 |         |
| Hypertension                                    | 900/1,285 (70.0%)       | 871/1,285 (67.8%)   | 0.216   | 285/386 (73.8%)         | 301/375 (80.3%) | 0.035   |
| Baseline Hemoglobin % A1c                       |                         |                     | 0.147   |                         |                 | 0.504   |
| N                                               | 617                     | 604                 |         | 153                     | 152             |         |
| Median (Q1, Q3)                                 | 6 (6, 6)                | 6 (5, 6)            |         | 6 (6, 6)                | 6 (6, 6)        |         |
| Prior Myocardial Infarction                     | 256/1,288 (19.9%)       | 246/1,286 (19.1%)   | 0.633   | 56/387 (14.5%)          | 60/377 (15.9%)  | 0.578   |
| Prior Percutaneous Coronary Intervention (PCI)  | 269/1,291 (20.8%)       | 262/1,289 (20.3%)   | 0.748   | 57/387 (14.7%)          | 54/377 (14.3%)  | 0.874   |
| Prior Coronary Artery Bypass Graft (CABG)       | 52/1,291 (4.0%)         | 42/1,291 (3.3%)     | 0.293   | 5/388 (1.3%)            | 11/377 (2.9%)   | 0.115   |
| Prior MI or Prior PCI or Prior CABG             | 396/1,289 (30.7%)       | 395/1,285 (30.7%)   | 0.992   | 87/386 (22.5%)          | 88/377 (23.3%)  | 0.792   |
| eGFR among Patients not on Dialysis at Baseline |                         |                     | 0.754   |                         |                 | 0.848   |
| N                                               | 1235                    | 1219                |         | 354                     | 345             |         |
| Median (Q1, Q3)                                 | 83 (69, 98)             | 82 (69, 97)         |         | 75 (60, 91)             | 76 (59, 91)     |         |
| EGFR ml/min/1.73 m2                             |                         |                     | 0.059   |                         |                 | 0.500   |
| Greater than 60                                 | 1,047/1,291 (81.1%)     | 1,067/1,291 (82.6%) |         | 272/388 (70.1%)         | 256/377 (67.9%) |         |
| Between 30 to 59                                | 144/1,291 (11.2%)       | 110/1,291 (8.5%)    |         | 54/388 (13.9%)          | 64/377 (17.0%)  |         |

| Characteristic                                                                    | No DM Male<br>(N=2,582) |                     |         | No DM Female<br>(N=765) |                 |         |
|-----------------------------------------------------------------------------------|-------------------------|---------------------|---------|-------------------------|-----------------|---------|
|                                                                                   | INV<br>(N=1,291)        | CON<br>(N=1,291)    | P-value | INV<br>(N=388)          | CON<br>(N=377)  | P-value |
| Less than 30 or on dialysis                                                       | 100/1,291 (7.7%)        | 114/1,291 (8.8%)    |         | 62/388 (16.0%)          | 57/377 (15.1%)  |         |
| On Dialysis at Baseline                                                           | 56/1,291 (4.3%)         | 72/1,291 (5.6%)     | 0.147   | 34/388 (8.8%)           | 32/377 (8.5%)   | 0.892   |
| <b>Non-Cardiac Vascular and Comorbidity History</b>                               |                         |                     |         |                         |                 |         |
| Prior Carotid Artery Surgery or Stent, Stroke, or Transient Ischemic Attack (TIA) | 100/1,290 (7.8%)        | 77/1,287 (6.0%)     | 0.076   | 26/386 (6.7%)           | 29/377 (7.7%)   | 0.610   |
| Prior Stroke                                                                      | 41/1,290 (3.2%)         | 25/1,291 (1.9%)     | 0.046   | 14/388 (3.6%)           | 12/377 (3.2%)   | 0.746   |
| Prior Surgery or Percutaneous Procedure for PAD                                   | 55/1,290 (4.3%)         | 35/1,289 (2.7%)     | 0.032   | 11/387 (2.8%)           | 12/377 (3.2%)   | 0.783   |
| <b>Angina History</b>                                                             |                         |                     |         |                         |                 |         |
| Baseline Seattle Angina Questionnaire Angina Frequency Scale                      |                         |                     | 0.131   |                         |                 | 0.943   |
| N                                                                                 | 1,173                   | 1,179               |         | 362                     | 365             |         |
| Median (25th, 75th)                                                               | 90 (70, 100)            | 90 (70, 100)        |         | 80 (70, 100)            | 80 (70, 100)    |         |
| Baseline Seattle Angina Questionnaire Angina Frequency Scale                      |                         |                     | 0.267   |                         |                 | 0.937   |
| Daily Angina (0-30)                                                               | 28/1,173 (2.4%)         | 21/1,179 (1.8%)     |         | 11/362 (3.0%)           | 12/365 (3.3%)   |         |
| Weekly Angina (31-60)                                                             | 224/1,173 (19.1%)       | 195/1,179 (16.5%)   |         | 64/362 (17.7%)          | 70/365 (19.2%)  |         |
| Monthly Angina (61-99)                                                            | 494/1,173 (42.1%)       | 520/1,179 (44.1%)   |         | 176/362 (48.6%)         | 177/365 (48.5%) |         |
| No Angina in Past Month (100)                                                     | 427/1,173 (36.4%)       | 443/1,179 (37.6%)   |         | 111/362 (30.7%)         | 106/365 (29.0%) |         |
| Participant Has Ever Had Angina                                                   | 1,163/1,291 (90.1%)     | 1,135/1,291 (87.9%) | 0.069   | 345/388 (88.9%)         | 341/377 (90.5%) | 0.486   |
| New Onset of Angina Over the Past 3 Months                                        | 223/1,229 (18.1%)       | 226/1,230 (18.4%)   | 0.883   | 60/364 (16.5%)          | 61/351 (17.4%)  | 0.750   |
| Left ventricular systolic dysfunction (35%≤EF≤45%)                                | 60/1,290 (4.7%)         | 63/1,289 (4.9%)     | 0.850   | 7/388 (1.8%)            | 19/377 (5.0%)   | 0.023   |
| Ejection Fraction*                                                                |                         |                     | 0.865   |                         |                 | 0.117   |
| N                                                                                 | 1,149                   | 1,126               |         | 341                     | 328             |         |
| Median (25th, 75th)                                                               | 60 (55, 64)             | 60 (55, 64)         |         | 62 (59, 67)             | 62 (56, 68)     |         |
| <b>Optimal Medical Therapy†</b>                                                   |                         |                     |         |                         |                 |         |
| LDL cholesterol < 70 mg/dL and on any statin                                      | 367/1,228 (29.9%)       | 344/1,235 (27.9%)   | 0.266   | 73/372 (19.6%)          | 77/366 (21.0%)  | 0.633   |
| Systolic blood pressure < 140 mmHg                                                | 854/1,280 (66.7%)       | 887/1,287 (68.9%)   | 0.233   | 254/388 (65.5%)         | 245/376 (65.2%) | 0.930   |
| Aspirin or other anti-platelet or anti-coagulant                                  | 1,242/1,289 (96.4%)     | 1,219/1,291 (94.4%) | 0.019   | 358/388 (92.3%)         | 346/377 (91.8%) | 0.802   |
| Non smoker                                                                        | 1,090/1,291 (84.4%)     | 1,102/1,289 (85.5%) | 0.451   | 348/388 (89.7%)         | 336/377 (89.1%) | 0.799   |

\*-reported value, if available. If not available, then core-lab entered value. EF, ejection fraction  
†ISCHEMIA definition of optimal medical therapy<sup>11</sup>

Table IVb. Comparison of participant baseline characteristics by treatment strategy, within DM-based subgroups for males and females with non-insulin treated DM

| Characteristic                                  | Non Insulin DM Male<br>(N=1,393) |                 |         | Non-Insulin DM Female<br>(N=389) |                 |         |
|-------------------------------------------------|----------------------------------|-----------------|---------|----------------------------------|-----------------|---------|
|                                                 | INV<br>(N=683)                   | CON<br>(N=710)  | P-value | INV<br>(N=206)                   | CON<br>(N=183)  | P-value |
| <b>Demographics</b>                             |                                  |                 |         |                                  |                 |         |
| Age at Randomization (yrs)                      |                                  |                 | 0.780   |                                  |                 | 0.187   |
| N                                               | 683                              | 710             |         | 206                              | 183             |         |
| Median (Q1, Q3)                                 | 64 (58, 70)                      | 64 (57, 70)     |         | 65 (58, 70)                      | 65 (60, 71)     |         |
| Race                                            |                                  |                 | 0.146   |                                  |                 | 0.191   |
| American Indian or Alaskan Native               | 0/670 (0.0%)                     | 4/698 (0.6%)    |         | 0/201 (0.0%)                     | 1/178 (0.6%)    |         |
| Asian                                           | 239/670 (35.7%)                  | 274/698 (39.3%) |         | 76/201 (37.8%)                   | 56/178 (31.5%)  |         |
| Native Hawaiian or Other Pacific Islander       | 3/670 (0.4%)                     | 2/698 (0.3%)    |         | 0/201 (0.0%)                     | 2/178 (1.1%)    |         |
| Black or African American                       | 34/670 (5.1%)                    | 31/698 (4.4%)   |         | 7/201 (3.5%)                     | 12/178 (6.7%)   |         |
| White                                           | 392/670 (58.5%)                  | 387/698 (55.4%) |         | 117/201 (58.2%)                  | 107/178 (60.1%) |         |
| Multiple Races Reported                         | 2/670 (0.3%)                     | 0/698 (0.0%)    |         | 1/201 (0.5%)                     | 0/178 (0.0%)    |         |
| Ethnicity                                       |                                  |                 | 0.055   |                                  |                 | 0.161   |
| Hispanic or Latino                              | 115/620 (18.5%)                  | 94/646 (14.6%)  |         | 28/191 (14.7%)                   | 35/173 (20.2%)  |         |
| Diabetes Treatment                              |                                  |                 | 0.834   |                                  |                 | 0.942   |
| Non-Insulin Diabetes Medication                 | 554/683 (81.1%)                  | 579/710 (81.5%) |         | 166/206 (80.6%)                  | 148/183 (80.9%) |         |
| None/Diet Controlled                            | 129/683 (18.9%)                  | 131/710 (18.5%) |         | 40/206 (19.4%)                   | 35/183 (19.1%)  |         |
| Cigarette Smoking                               |                                  |                 | 0.409   |                                  |                 | 0.435   |
| Never Smoked                                    | 277/682 (40.6%)                  | 272/709 (38.4%) |         | 150/206 (72.8%)                  | 128/182 (70.3%) |         |
| Former Smoker                                   | 339/682 (49.7%)                  | 354/709 (49.9%) |         | 38/206 (18.4%)                   | 42/182 (23.1%)  |         |
| Current Smoker                                  | 66/682 (9.7%)                    | 83/709 (11.7%)  |         | 18/206 (8.7%)                    | 12/182 (6.6%)   |         |
| <b>Clinical History</b>                         |                                  |                 |         |                                  |                 |         |
| Hypertension                                    | 538/682 (78.9%)                  | 553/707 (78.2%) | 0.762   | 165/206 (80.1%)                  | 159/183 (86.9%) | 0.073   |
| Baseline Hemoglobin % A1c                       |                                  |                 | 0.111   |                                  |                 | 0.987   |
| N                                               | 628                              | 642             |         | 183                              | 163             |         |
| Median (Q1, Q3)                                 | 7 (6, 8)                         | 7 (6, 8)        |         | 7 (6, 8)                         | 7 (6, 8)        |         |
| Prior Myocardial Infarction                     | 126/679 (18.6%)                  | 141/708 (19.9%) | 0.521   | 34/205 (16.6%)                   | 30/183 (16.4%)  | 0.959   |
| Prior Percutaneous Coronary Intervention (PCI)  | 154/682 (22.6%)                  | 136/710 (19.2%) | 0.116   | 32/206 (15.5%)                   | 23/183 (12.6%)  | 0.402   |
| Prior Coronary Artery Bypass Graft (CABG)       | 40/683 (5.9%)                    | 32/710 (4.5%)   | 0.255   | 3/206 (1.5%)                     | 4/183 (2.2%)    | 0.711   |
| Prior MI or Prior PCI or Prior CABG             | 223/679 (32.8%)                  | 214/708 (30.2%) | 0.294   | 50/205 (24.4%)                   | 40/183 (21.9%)  | 0.555   |
| eGFR among Patients not on Dialysis at Baseline |                                  |                 | 0.974   |                                  |                 | 0.845   |
| N                                               | 657                              | 681             |         | 194                              | 174             |         |
| Median (Q1, Q3)                                 | 81 (65, 96)                      | 80 (65, 96)     |         | 76 (60, 92)                      | 74 (60, 93)     |         |
| EGFR ml/min/1.73 m <sup>2</sup>                 |                                  |                 | 0.594   |                                  |                 | 0.978   |
| Greater than 60                                 | 545/683 (79.8%)                  | 562/710 (79.2%) |         | 146/206 (70.9%)                  | 131/183 (71.6%) |         |
| Between 30 to 59                                | 77/683 (11.3%)                   | 91/710 (12.8%)  |         | 40/206 (19.4%)                   | 34/183 (18.6%)  |         |
| Less than 30 or on dialysis                     | 61/683 (8.9%)                    | 57/710 (8.0%)   |         | 20/206 (9.7%)                    | 18/183 (9.8%)   |         |
| On Dialysis at Baseline                         | 26/683 (3.8%)                    | 29/710 (4.1%)   | 0.790   | 12/206 (5.8%)                    | 9/183 (4.9%)    | 0.693   |

| Characteristic                                                                    | Non Insulin DM Male<br>(N=1,393) |                 |         | Non-Insulin DM Female<br>(N=389) |                 |         |
|-----------------------------------------------------------------------------------|----------------------------------|-----------------|---------|----------------------------------|-----------------|---------|
|                                                                                   | INV<br>(N=683)                   | CON<br>(N=710)  | P-value | INV<br>(N=206)                   | CON<br>(N=183)  | P-value |
| <b>Non-Cardiac Vascular and Comorbidity History</b>                               |                                  |                 |         |                                  |                 |         |
| Prior Carotid Artery Surgery or Stent, Stroke, or Transient Ischemic Attack (TIA) | 59/681 (8.7%)                    | 58/709 (8.2%)   | 0.746   | 17/206 (8.3%)                    | 10/183 (5.5%)   | 0.280   |
| Prior Stroke                                                                      | 24/683 (3.5%)                    | 33/710 (4.6%)   | 0.286   | 6/206 (2.9%)                     | 4/183 (2.2%)    | 0.755   |
| Prior Surgery or Percutaneous Procedure for PAD                                   | 35/683 (5.1%)                    | 32/709 (4.5%)   | 0.594   | 10/206 (4.9%)                    | 4/183 (2.2%)    | 0.158   |
| <b>Angina History</b>                                                             |                                  |                 |         |                                  |                 |         |
| Baseline Seattle Angina Questionnaire Angina Frequency Scale                      |                                  |                 | 0.090   |                                  |                 | 0.119   |
| N                                                                                 | 584                              | 602             |         | 178                              | 162             |         |
| Median (25th, 75th)                                                               | 90 (70, 100)                     | 90 (80, 100)    |         | 80 (60, 100)                     | 80 (70, 100)    |         |
| Baseline Seattle Angina Questionnaire Angina Frequency Scale                      |                                  |                 | 0.290   |                                  |                 | 0.308   |
| Daily Angina (0-30)                                                               | 12/584 (2.1%)                    | 13/602 (2.2%)   |         | 8/178 (4.5%)                     | 3/162 (1.9%)    |         |
| Weekly Angina (31-60)                                                             | 99/584 (17.0%)                   | 79/602 (13.1%)  |         | 42/178 (23.6%)                   | 31/162 (19.1%)  |         |
| Monthly Angina (61-99)                                                            | 237/584 (40.6%)                  | 246/602 (40.9%) |         | 82/178 (46.1%)                   | 77/162 (47.5%)  |         |
| No Angina in Past Month (100)                                                     | 236/584 (40.4%)                  | 264/602 (43.9%) |         | 46/178 (25.8%)                   | 51/162 (31.5%)  |         |
| Participant Has Ever Had Angina                                                   | 594/683 (87.0%)                  | 615/710 (86.6%) | 0.847   | 189/206 (91.7%)                  | 164/183 (89.6%) | 0.469   |
| New Onset of Angina Over the Past 3 Months                                        | 105/646 (16.3%)                  | 116/682 (17.0%) | 0.712   | 28/199 (14.1%)                   | 33/176 (18.8%)  | 0.220   |
| Left ventricular systolic dysfunction (35%≤EF≤45%)                                | 56/682 (8.2%)                    | 31/709 (4.4%)   | 0.004   | 1/206 (0.5%)                     | 10/183 (5.5%)   | 0.008   |
| Ejection Fraction*                                                                |                                  |                 | 0.392   |                                  |                 | 0.172   |
| N                                                                                 | 606                              | 636             |         | 178                              | 171             |         |
| Median (25th, 75th)                                                               | 60 (53, 64)                      | 60 (54, 64)     |         | 62 (58, 67)                      | 62 (57, 67)     |         |
| <b>Optimal Medical Therapy†</b>                                                   |                                  |                 |         |                                  |                 |         |
| LDL cholesterol < 70 mg/dL and on any statin                                      | 271/649 (41.8%)                  | 299/682 (43.8%) | 0.442   | 51/192 (26.6%)                   | 47/176 (26.7%)  | 0.975   |
| Systolic blood pressure < 140 mmHg                                                | 407/680 (59.9%)                  | 451/708 (63.7%) | 0.140   | 114/205 (55.6%)                  | 111/183 (60.7%) | 0.315   |
| Aspirin or other anti-platelet or anti-coagulant                                  | 650/683 (95.2%)                  | 681/710 (95.9%) | 0.499   | 195/206 (94.7%)                  | 171/182 (94.0%) | 0.765   |
| Non smoker                                                                        | 616/682 (90.3%)                  | 626/709 (88.3%) | 0.221   | 188/206 (91.3%)                  | 170/182 (93.4%) | 0.430   |

\*Site-reported value, if available. If not available, then core-lab entered value.  
†ISCHEMIA definition of optimal medical therapy<sup>11</sup>

Table IVc. Comparison of participant baseline characteristics by treatment strategy, within DM-based subgroups for males and females with insulin treated DM

| Characteristic                                      | Insulin DM Male<br>(N=531) |                  | P-value | Insulin DM Female<br>(N=240) |                  | P-value |
|-----------------------------------------------------|----------------------------|------------------|---------|------------------------------|------------------|---------|
|                                                     | INV<br>(N=256)             | CON<br>(N=275)   |         | INV<br>(N=121)               | CON<br>(N=119)   |         |
| <b>Demographics</b>                                 |                            |                  |         |                              |                  |         |
| Age at Randomization (yrs)                          |                            |                  | 0.940   |                              |                  | 0.097   |
| N                                                   | 256                        | 275              |         | 121                          | 119              |         |
| Median (Q1, Q3)                                     | 63 (58, 69)                | 64 (58, 69)      |         | 62 (57, 70)                  | 65 (60, 70)      |         |
| Race                                                |                            |                  | 0.753   |                              |                  | 0.498   |
| American Indian or Alaskan Native                   | 2/253 (0.8%)               | 1/268 (0.4%)     |         | 1/118 (0.8%)                 | 0/116 (0.0%)     |         |
| Asian                                               | 63/253 (24.9%)             | 61/268 (22.8%)   |         | 21/118 (17.8%)               | 20/116 (17.2%)   |         |
| Native Hawaiian or Other Pacific Islander           | 0/253 (0.0%)               | 1/268 (0.4%)     |         | 0/118 (0.0%)                 | 2/116 (1.7%)     |         |
| Black or African American                           | 22/253 (8.7%)              | 31/268 (11.6%)   |         | 14/118 (11.9%)               | 11/116 (9.5%)    |         |
| White                                               | 165/253 (65.2%)            | 173/268 (64.6%)  |         | 82/118 (69.5%)               | 82/116 (70.7%)   |         |
| Multiple Races Reported                             | 1/253 (0.4%)               | 1/268 (0.4%)     |         | 0/118 (0.0%)                 | 1/116 (0.9%)     |         |
| Ethnicity                                           |                            |                  | 0.448   |                              |                  | 0.530   |
| Hispanic or Latino                                  | 46/237 (19.4%)             | 44/262 (16.8%)   |         | 23/113 (20.4%)               | 26/109 (23.9%)   |         |
| Diabetes Treatment                                  |                            |                  |         |                              |                  |         |
| Insulin Treated                                     | 256/256 (100.0%)           | 275/275 (100.0%) |         | 121/121 (100.0%)             | 119/119 (100.0%) |         |
| Cigarette Smoking                                   |                            |                  | 0.709   |                              |                  | 0.278   |
| Never Smoked                                        | 91/256 (35.5%)             | 90/275 (32.7%)   |         | 88/121 (72.7%)               | 83/119 (69.7%)   |         |
| Former Smoker                                       | 137/256 (53.5%)            | 157/275 (57.1%)  |         | 26/121 (21.5%)               | 33/119 (27.7%)   |         |
| Current Smoker                                      | 28/256 (10.9%)             | 28/275 (10.2%)   |         | 7/121 (5.8%)                 | 3/119 (2.5%)     |         |
| <b>Clinical History</b>                             |                            |                  |         |                              |                  |         |
| Hypertension                                        | 223/254 (87.8%)            | 245/275 (89.1%)  | 0.641   | 110/121 (90.9%)              | 112/119 (94.1%)  | 0.345   |
| Baseline Hemoglobin % A1c                           |                            |                  | 0.058   |                              |                  | 0.645   |
| N                                                   | 236                        | 252              |         | 112                          | 114              |         |
| Median (Q1, Q3)                                     | 8 (7, 9)                   | 8 (7, 9)         |         | 8 (7, 9)                     | 8 (7, 9)         |         |
| Prior Myocardial Infarction                         | 59/256 (23.0%)             | 61/274 (22.3%)   | 0.829   | 19/121 (15.7%)               | 21/118 (17.8%)   | 0.665   |
| Prior Percutaneous Coronary Intervention (PCI)      | 76/256 (29.7%)             | 67/275 (24.4%)   | 0.167   | 30/121 (24.8%)               | 23/119 (19.3%)   | 0.307   |
| Prior Coronary Artery Bypass Graft (CABG)           | 15/256 (5.9%)              | 14/275 (5.1%)    | 0.697   | 8/121 (6.6%)                 | 3/119 (2.5%)     | 0.130   |
| Prior MI or Prior PCI or Prior CABG                 | 107/256 (41.8%)            | 102/274 (37.2%)  | 0.282   | 39/121 (32.2%)               | 34/119 (28.6%)   | 0.538   |
| eGFR among Patients not on Dialysis at Baseline     |                            |                  | 0.070   |                              |                  | 0.089   |
| N                                                   | 206                        | 220              |         | 102                          | 98               |         |
| Median (Q1, Q3)                                     | 69 (29, 91)                | 74 (53, 92)      |         | 67 (46, 89)                  | 59 (29, 81)      |         |
| EGFR ml/min/1.73 m <sup>2</sup>                     |                            |                  | 0.051   |                              |                  | 0.246   |
| Greater than 60                                     | 112/256 (43.8%)            | 148/275 (53.8%)  |         | 61/121 (50.4%)               | 49/119 (41.2%)   |         |
| Between 30 to 59                                    | 41/256 (16.0%)             | 31/275 (11.3%)   |         | 25/121 (20.7%)               | 24/119 (20.2%)   |         |
| Less than 30 or on dialysis                         | 103/256 (40.2%)            | 96/275 (34.9%)   |         | 35/121 (28.9%)               | 46/119 (38.7%)   |         |
| On Dialysis at Baseline                             | 50/256 (19.5%)             | 55/275 (20.0%)   | 0.892   | 19/121 (15.7%)               | 21/119 (17.6%)   | 0.686   |
| <b>Non-Cardiac Vascular and Comorbidity History</b> |                            |                  |         |                              |                  |         |

| Characteristic                                                                                                                                                           | Insulin DM Male<br>(N=531) |                 |         | Insulin DM Female<br>(N=240) |                 |         |
|--------------------------------------------------------------------------------------------------------------------------------------------------------------------------|----------------------------|-----------------|---------|------------------------------|-----------------|---------|
|                                                                                                                                                                          | INV<br>(N=256)             | CON<br>(N=275)  | P-value | INV<br>(N=121)               | CON<br>(N=119)  | P-value |
| Prior Carotid Artery Surgery or Stent, Stroke, or Transient Ischemic Attack (TIA)                                                                                        | 38/255 (14.9%)             | 29/274 (10.6%)  | 0.136   | 11/121 (9.1%)                | 20/118 (16.9%)  | 0.071   |
| Prior Stroke                                                                                                                                                             | 24/256 (9.4%)              | 15/275 (5.5%)   | 0.084   | 9/121 (7.4%)                 | 10/119 (8.4%)   | 0.782   |
| Prior Surgery or Percutaneous Procedure for PAD                                                                                                                          | 20/255 (7.8%)              | 21/274 (7.7%)   | 0.939   | 9/121 (7.4%)                 | 6/117 (5.1%)    | 0.464   |
| <b>Angina History</b>                                                                                                                                                    |                            |                 |         |                              |                 |         |
| Baseline Seattle Angina Questionnaire Angina Frequency Scale                                                                                                             |                            |                 | 0.727   |                              |                 | 0.924   |
| N                                                                                                                                                                        | 233                        | 252             |         | 116                          | 117             |         |
| Median (25th, 75th)                                                                                                                                                      | 90 (80, 100)               | 90 (80, 100)    |         | 85 (70, 100)                 | 80 (70, 100)    |         |
| Baseline Seattle Angina Questionnaire Angina Frequency Scale                                                                                                             |                            |                 | 0.998   |                              |                 | 0.739   |
| Daily Angina (0-30)                                                                                                                                                      | 8/233 (3.4%)               | 8/252 (3.2%)    |         | 1/116 (0.9%)                 | 2/117 (1.7%)    |         |
| Weekly Angina (31-60)                                                                                                                                                    | 26/233 (11.2%)             | 29/252 (11.5%)  |         | 19/116 (16.4%)               | 22/117 (18.8%)  |         |
| Monthly Angina (61-99)                                                                                                                                                   | 97/233 (41.6%)             | 105/252 (41.7%) |         | 59/116 (50.9%)               | 52/117 (44.4%)  |         |
| No Angina in Past Month (100)                                                                                                                                            | 102/233 (43.8%)            | 110/252 (43.7%) |         | 37/116 (31.9%)               | 41/117 (35.0%)  |         |
| Participant Has Ever Had Angina                                                                                                                                          | 200/256 (78.1%)            | 231/275 (84.0%) | 0.074   | 101/121 (83.5%)              | 101/119 (84.9%) | 0.766   |
| New Onset of Angina Over the Past 3 Months                                                                                                                               | 33/243 (13.6%)             | 50/262 (19.1%)  | 0.095   | 17/115 (14.8%)               | 14/113 (12.4%)  | 0.598   |
| Left ventricular systolic dysfunction (35%≤EF<45%)                                                                                                                       | 25/256 (9.8%)              | 22/275 (8.0%)   | 0.574   | 5/121 (4.1%)                 | 7/119 (5.9%)    | 0.745   |
| Ejection Fraction*                                                                                                                                                       |                            |                 | 0.079   |                              |                 | 0.253   |
| N                                                                                                                                                                        | 233                        | 235             |         | 105                          | 98              |         |
| Median (25th, 75th)                                                                                                                                                      | 57 (51, 61)                | 60 (50, 65)     |         | 62 (55, 68)                  | 60 (55, 65)     |         |
| <b>Optimal Medical Therapy†</b>                                                                                                                                          |                            |                 |         |                              |                 |         |
| LDL cholesterol < 70 mg/dL and on any statin                                                                                                                             | 99/238 (41.6%)             | 107/250 (42.8%) | 0.788   | 41/114 (36.0%)               | 39/113 (34.5%)  | 0.819   |
| Systolic blood pressure < 140 mmHg                                                                                                                                       | 142/256 (55.5%)            | 160/272 (58.8%) | 0.436   | 67/120 (55.8%)               | 61/118 (51.7%)  | 0.522   |
| Aspirin or other anti-platelet or anti-coagulant                                                                                                                         | 241/256 (94.1%)            | 258/275 (93.8%) | 0.876   | 113/121 (93.4%)              | 105/119 (88.2%) | 0.167   |
| Non smoker                                                                                                                                                               | 228/256 (89.1%)            | 247/275 (89.8%) | 0.777   | 114/121 (94.2%)              | 116/119 (97.5%) | 0.333   |
| Site-reported value, if available. If not available, then core-lab entered value. EF, ejection fraction<br>†ISCHEMIA definition of optimal medical therapy <sup>11</sup> |                            |                 |         |                              |                 |         |

Figure 1a. Kaplan-Meier estimate of cumulative event rates of death or MI by diabetes status

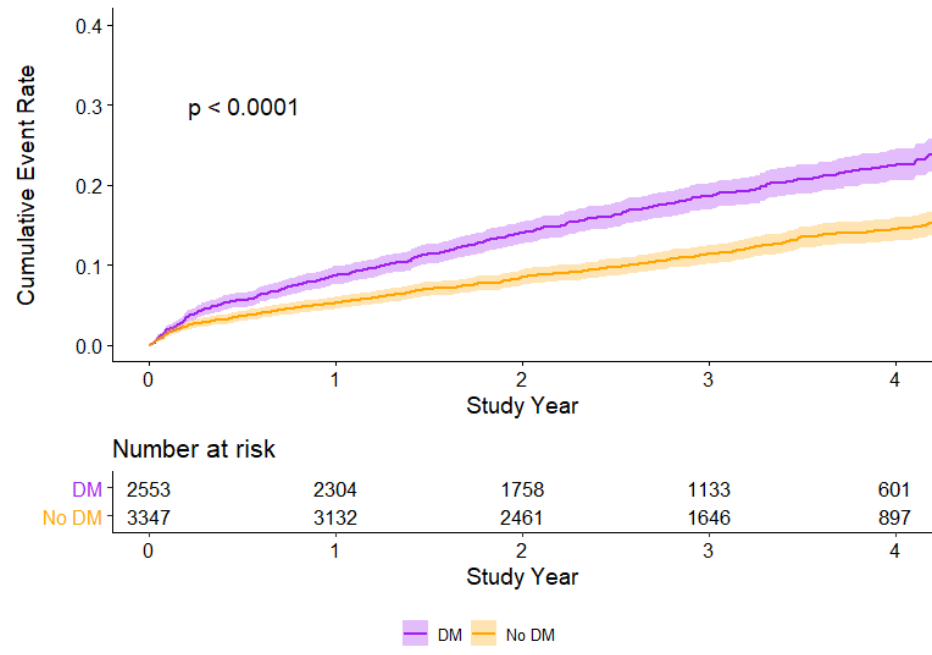

Figure 1b. Kaplan-Meier estimate of cumulative event rates of death or MI by clinical features of diabetes

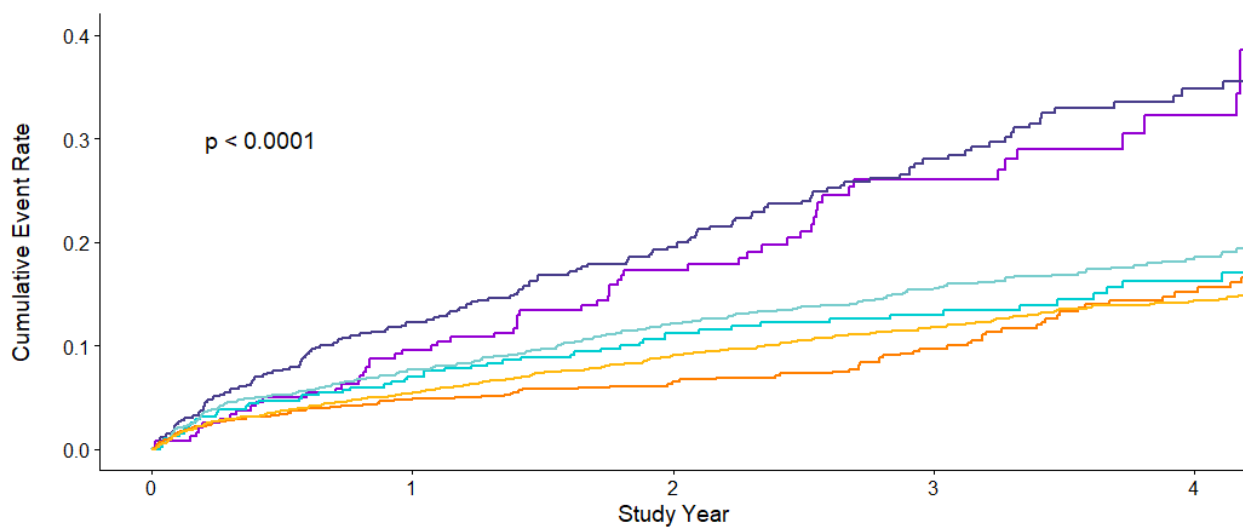

Number at risk

|                               | 0    | 1    | 2    | 3    | 4   |
|-------------------------------|------|------|------|------|-----|
| Insulin treated DM Female     | 240  | 217  | 155  | 93   | 36  |
| Insulin treated DM Male       | 531  | 461  | 330  | 186  | 94  |
| Non-insulin treated DM Female | 389  | 356  | 283  | 213  | 110 |
| Non-insulin treated DM Male   | 1393 | 1270 | 990  | 641  | 361 |
| No DM Female                  | 765  | 721  | 573  | 370  | 189 |
| No DM Male                    | 2582 | 2411 | 1888 | 1276 | 708 |

— Insulin treated DM Female   
 — Non-insulin treated DM Female   
 — No DM Female  
— Insulin treated DM Male   
 — Non-insulin treated DM Male   
 — No DM Male



Figure 1c. Cumulative incidence of nonprocedural MI (types 1, 2, 4b or 4c) (accounting for competing risks) by diabetes status

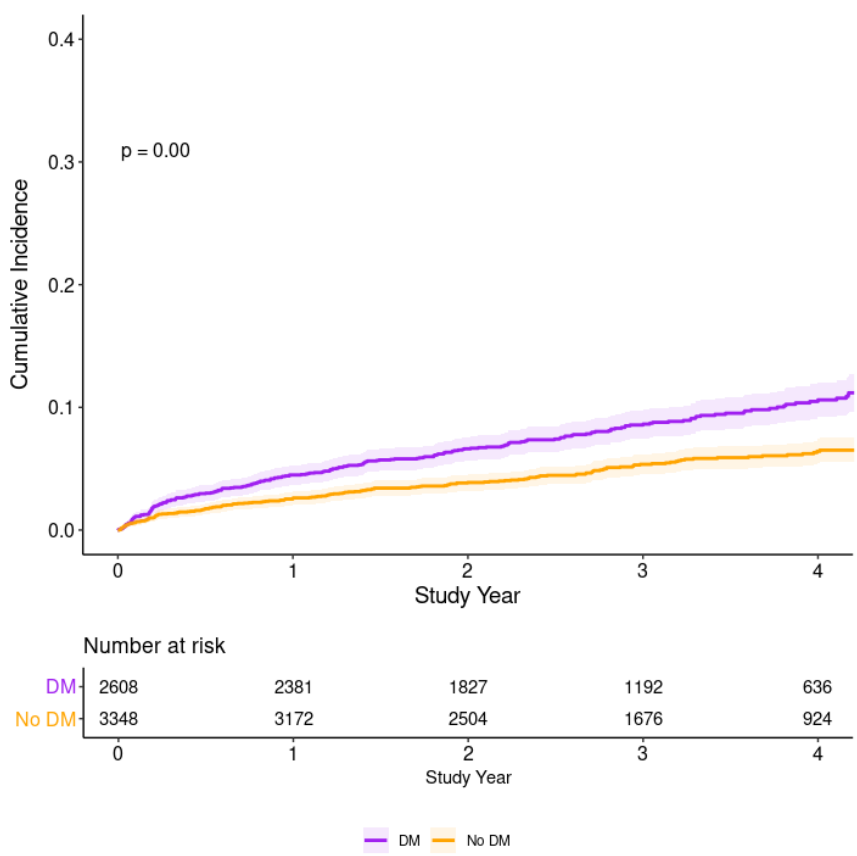

Figure 1d. Cumulative incidence of procedural MI (types 4a or 5) (accounting for competing risks) by diabetes status

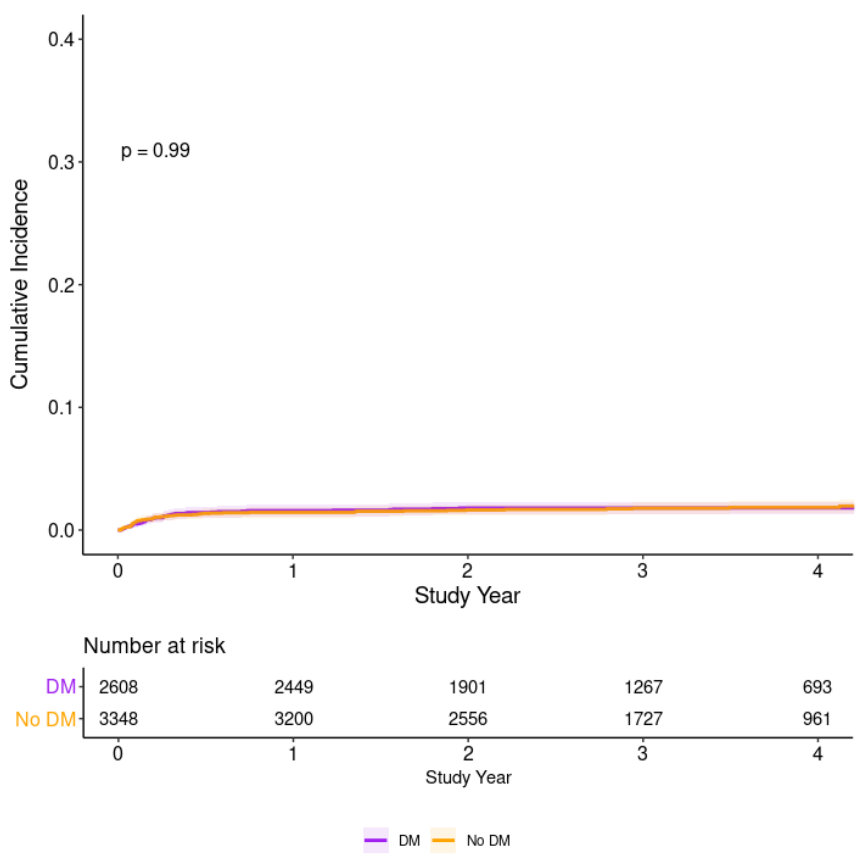

Figure 1Ia. Comparison of association of death or MI with diabetes status in the ISCHEMIA Trials, ISCHEMIA, and ISCHEMIA-CKD

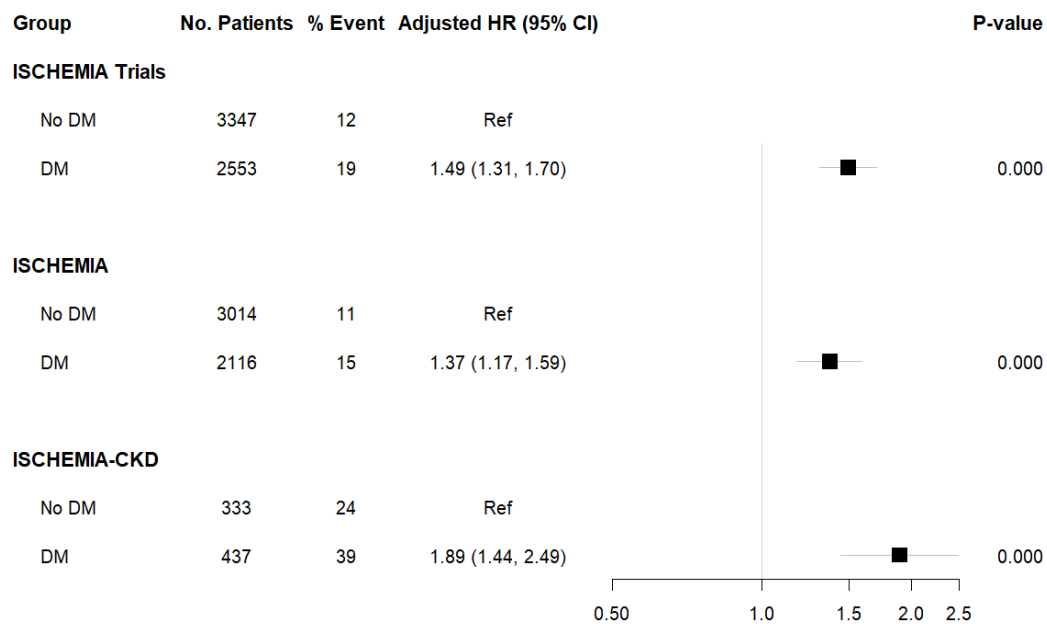

Figure IIb. Comparison of the association of death or MI with clinical features of diabetes in the ISCHEMIA Trials, ISCHEMIA, and ISCHEMIA-CKD

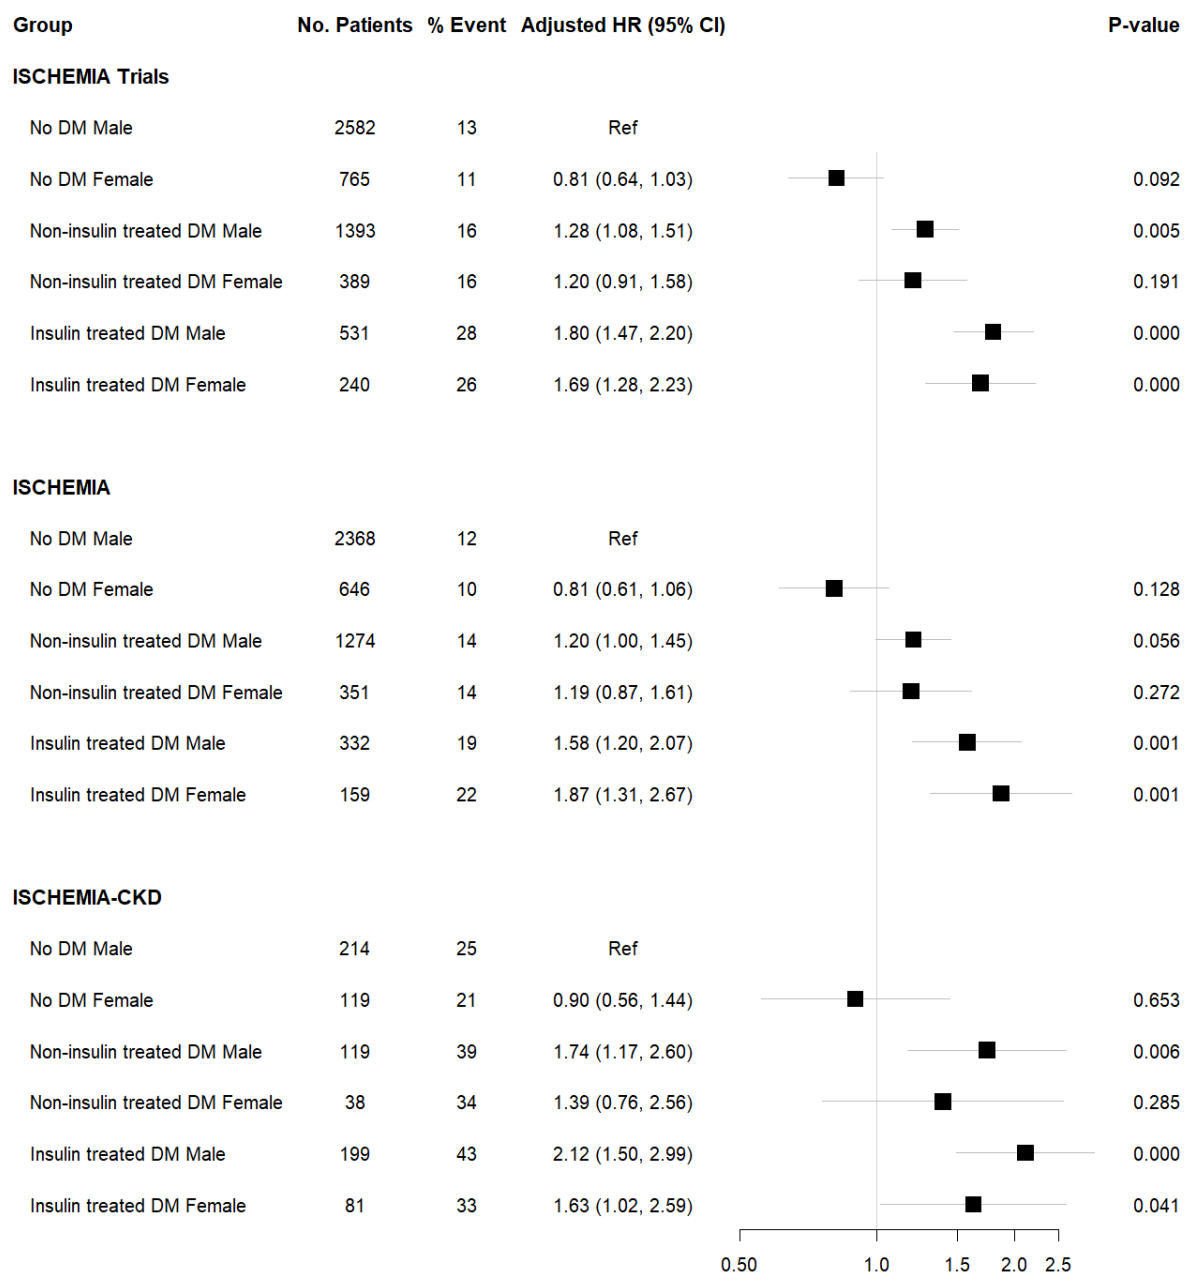

Figure IIIa-f. Kaplan-Meier estimate of cumulative event rates of death or MI by treatment strategy, stratified by clinical features of diabetes

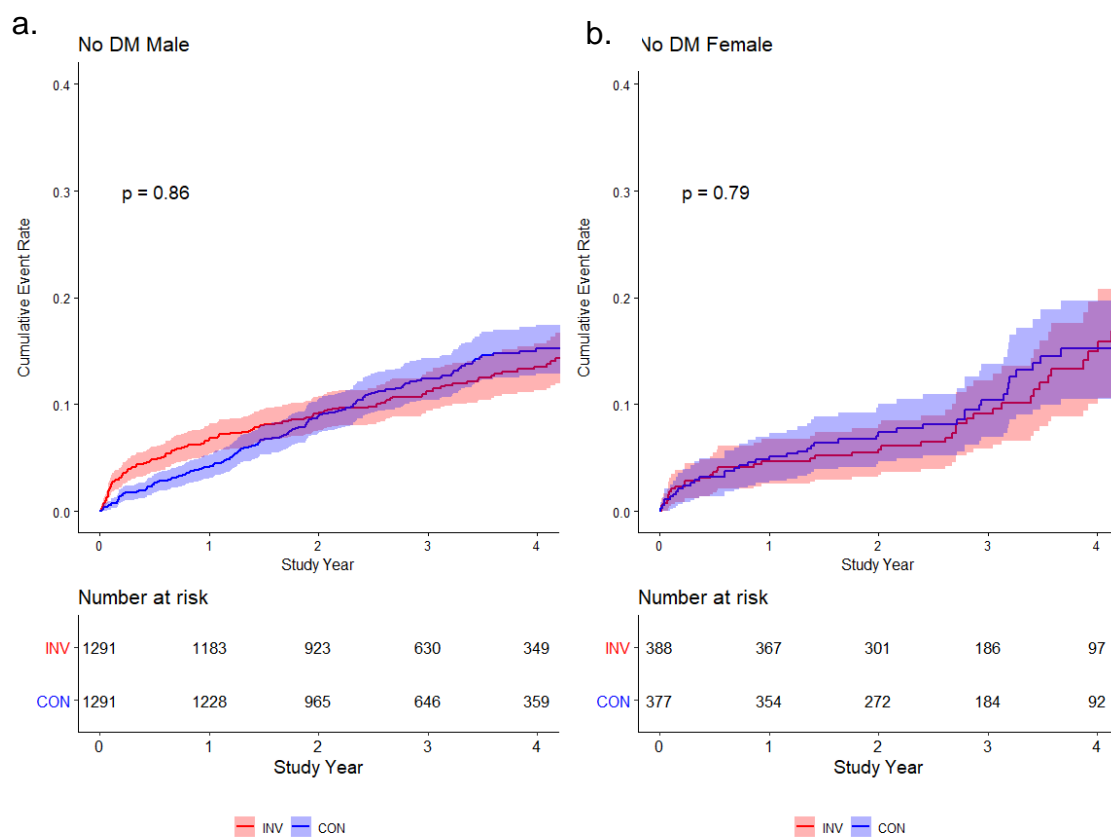

**c.** Non-insulin treated DM Male

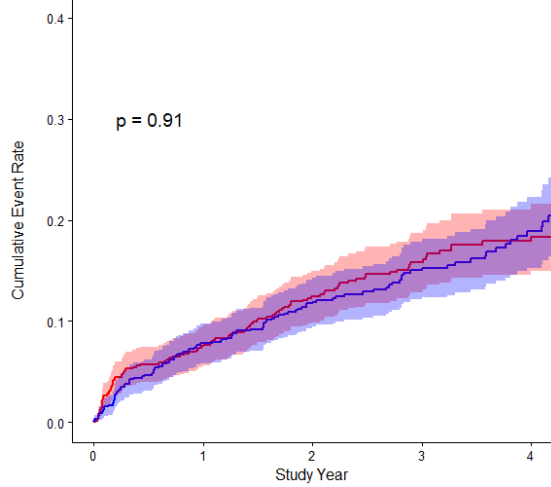

Number at risk

|     | 0   | 1   | 2   | 3   | 4   |
|-----|-----|-----|-----|-----|-----|
| INV | 683 | 620 | 485 | 313 | 184 |
| CON | 710 | 650 | 505 | 328 | 177 |

Study Year

■ INV ■ CON

**d.** Non-insulin treated DM Female

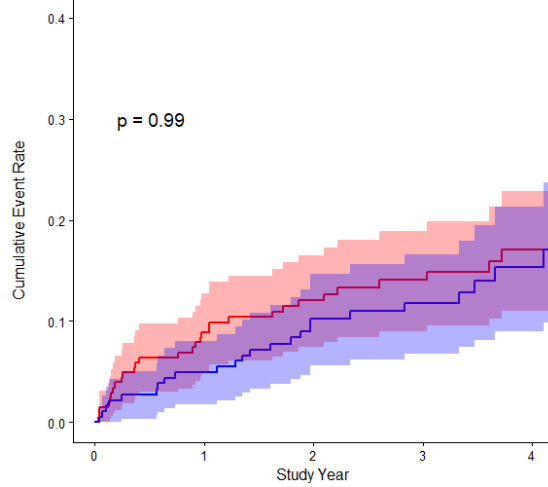

Number at risk

|     | 0   | 1   | 2   | 3   | 4  |
|-----|-----|-----|-----|-----|----|
| INV | 206 | 183 | 145 | 110 | 59 |
| CON | 183 | 173 | 138 | 103 | 51 |

Study Year

■ INV ■ CON

e.

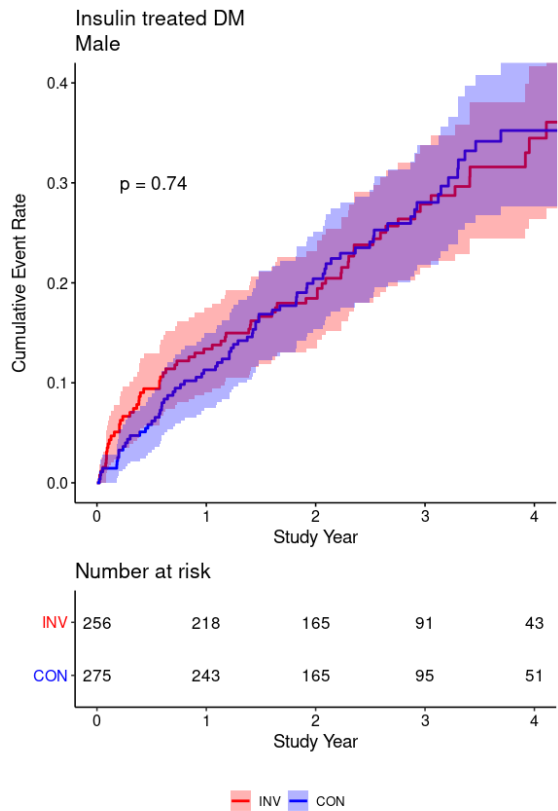

f.

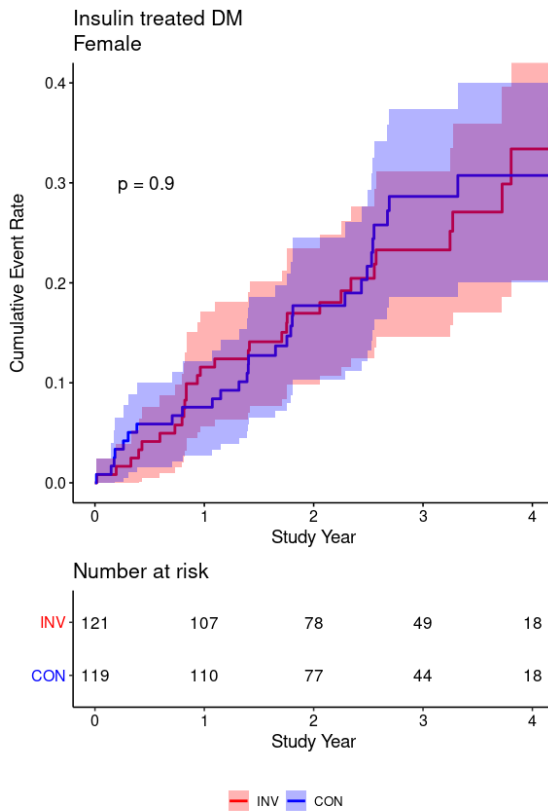

Figure IVa. Diabetes and clinical feature-specific treatment effects over study follow-up in the ISCHEMIA trial. Vertical gray bar is the overall treatment effect and the associated gray shading correspond to the 95% credible area. Vertical dashed red bar is at 1 for reference.

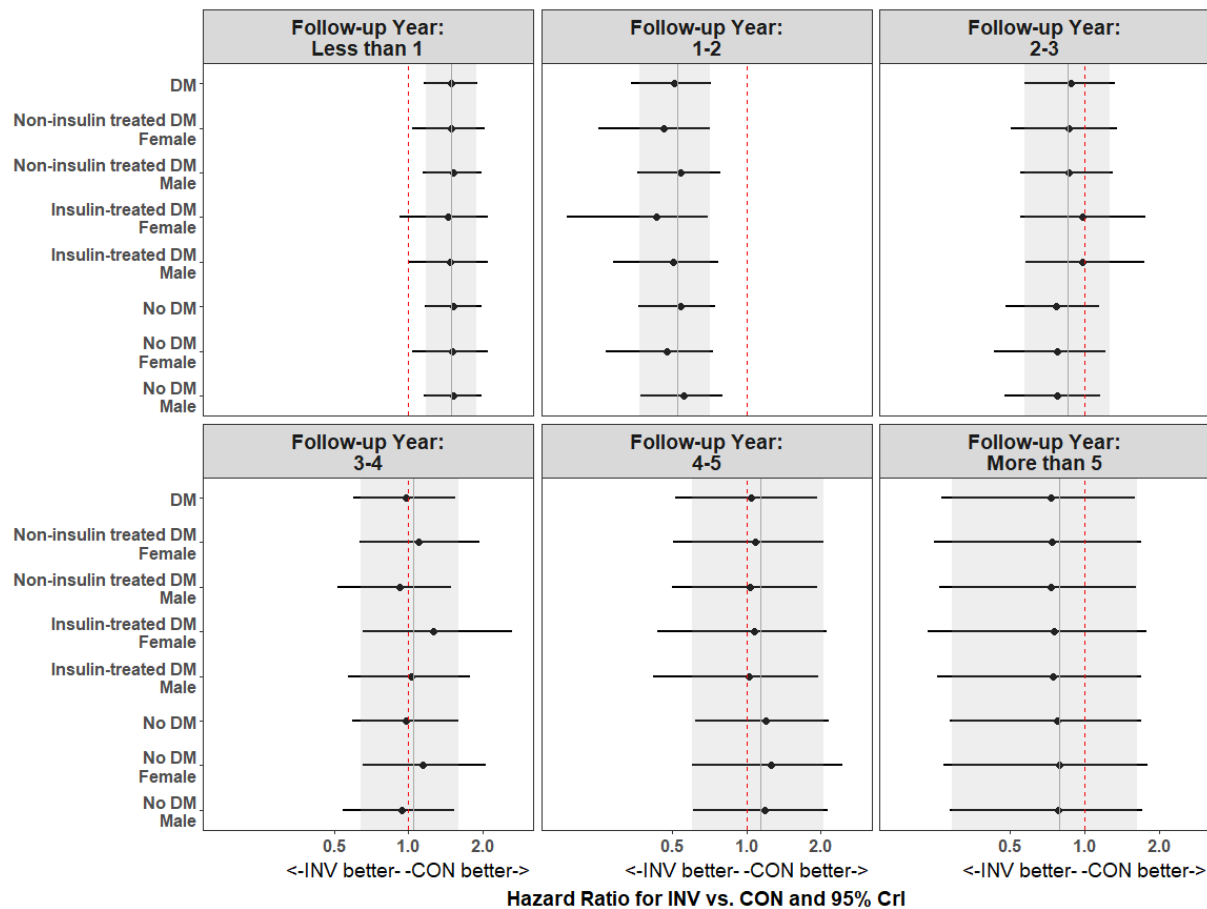



Figure IVb. Diabetes and clinical feature-specific -specific treatment effects over study follow-up in the ISCHEMIA-CKD trial. Vertical gray bar is the overall treatment effect and the associated gray shading correspond to the 95% credible area. Vertical dashed red bar is at 1 for reference.

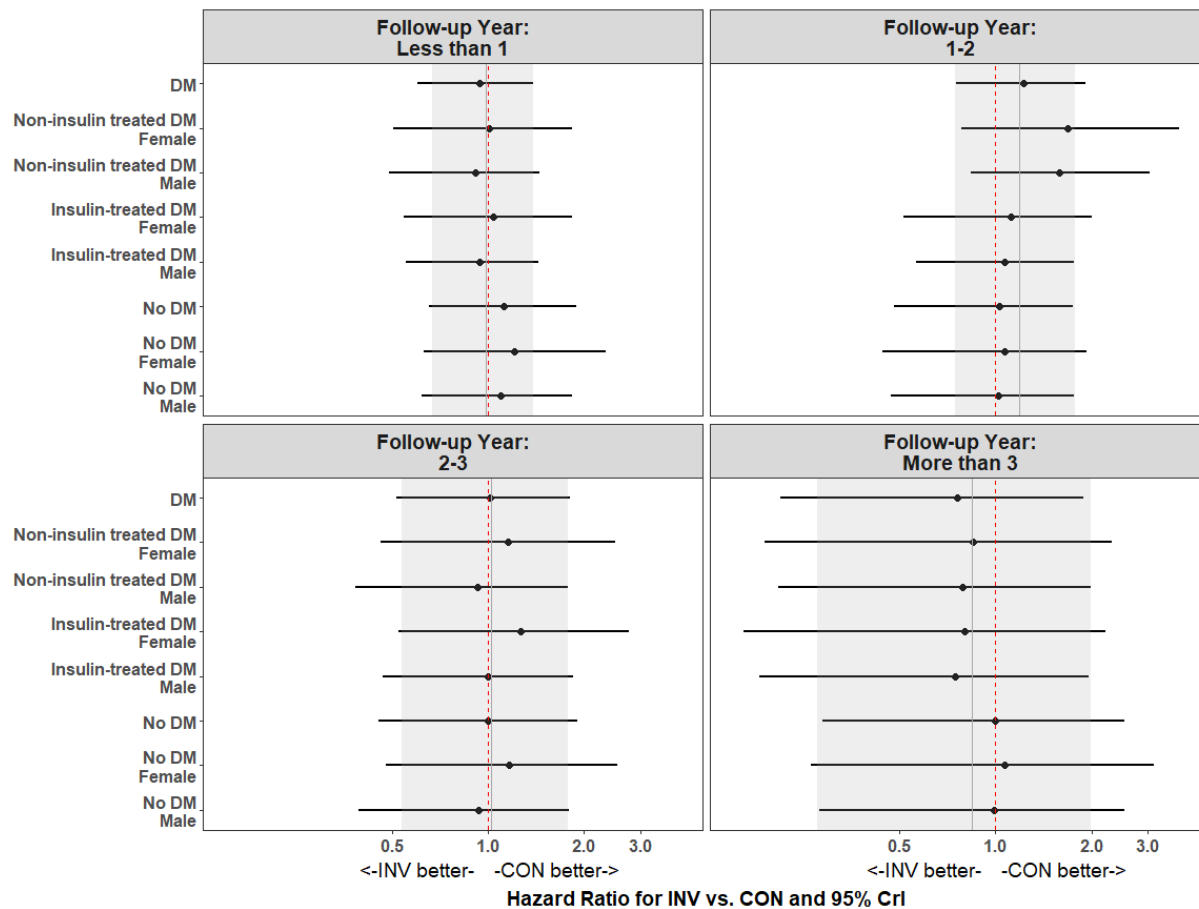

Figure V. Summary diabetes and clinical feature-specific treatment effects based on proportional hazards in the ISCHEMIA Trials, ISCHEMIA, and ISCHEMIA-CKD. Vertical gray bar is the overall treatment effect and the associated gray shading correspond to the 95% credible area. Vertical dashed red bar is at 1 for reference

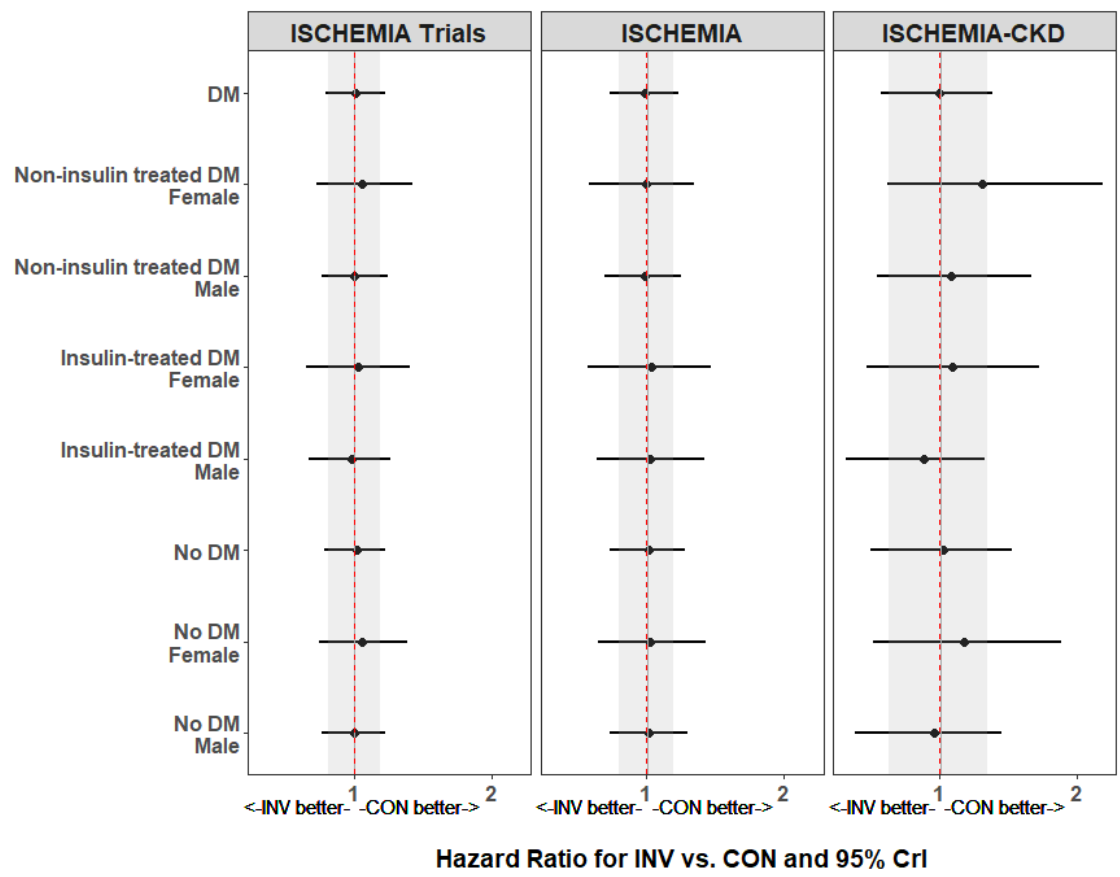

Figure VIa. Kaplan-Meier estimate of cumulative event rates of death by treatment strategy, stratified by diabetes status

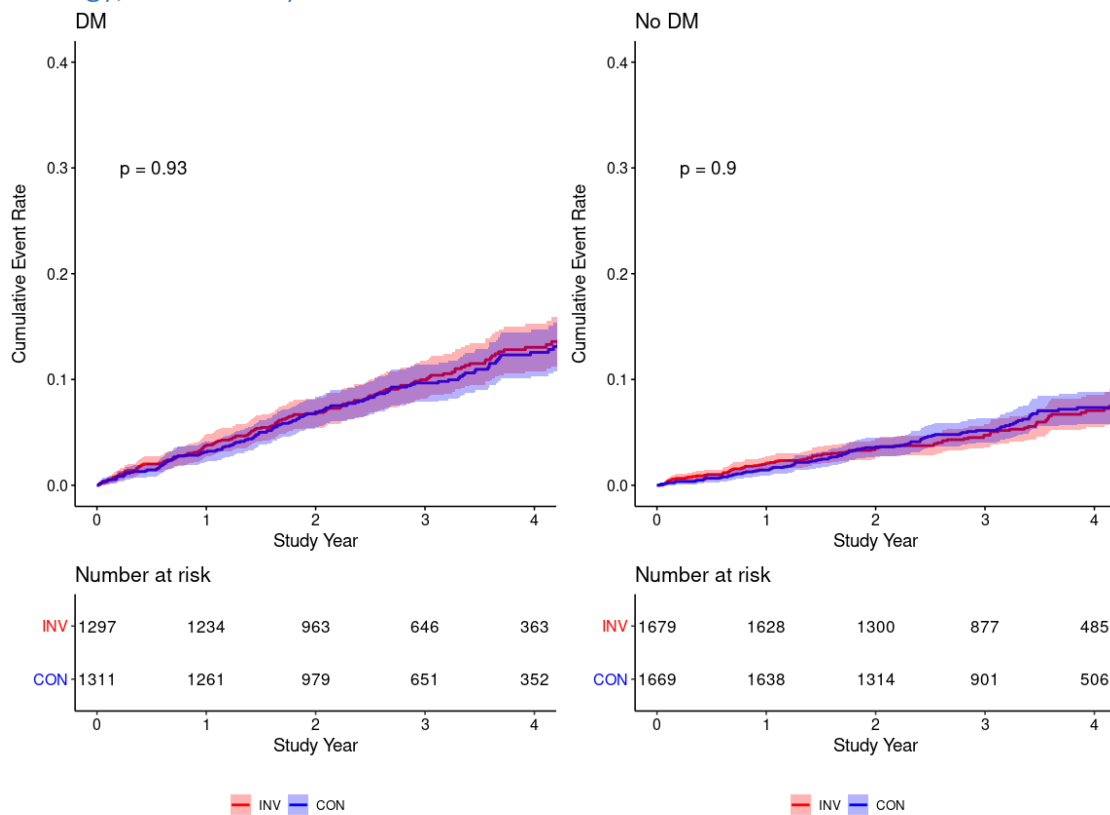

Figure VIb. Cumulative incidence of CV death (accounting for competing risks) by treatment strategy, stratified by diabetes status

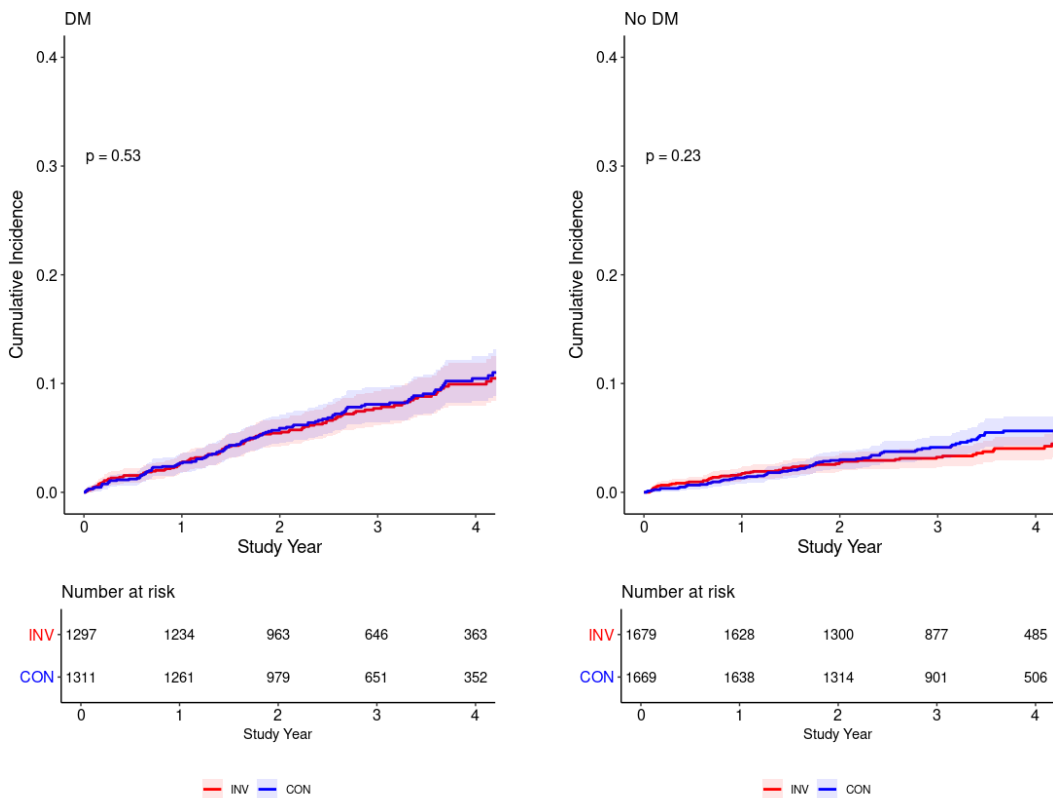

Figure VIc. Cumulative incidence of non-CV death (accounting for competing risks) by treatment strategy, stratified by diabetes status

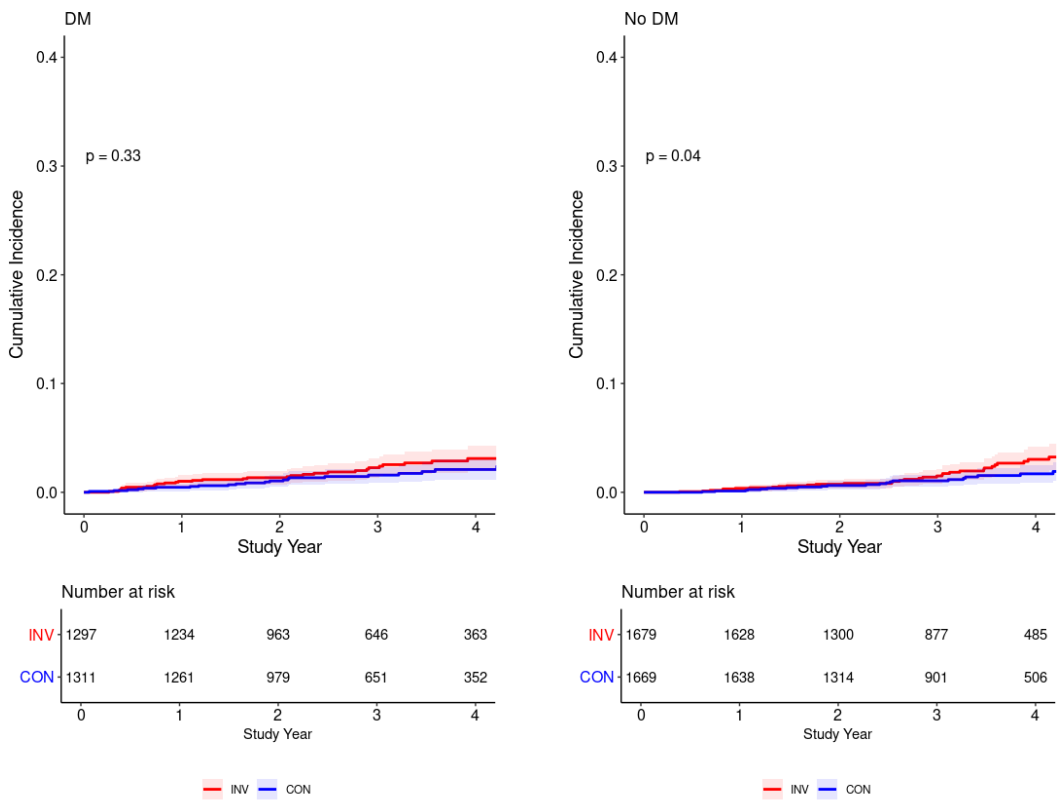

Figure VI.d. Cumulative incidence of fatal and non-fatal MI (accounting for competing risks) by treatment strategy, stratified by diabetes status

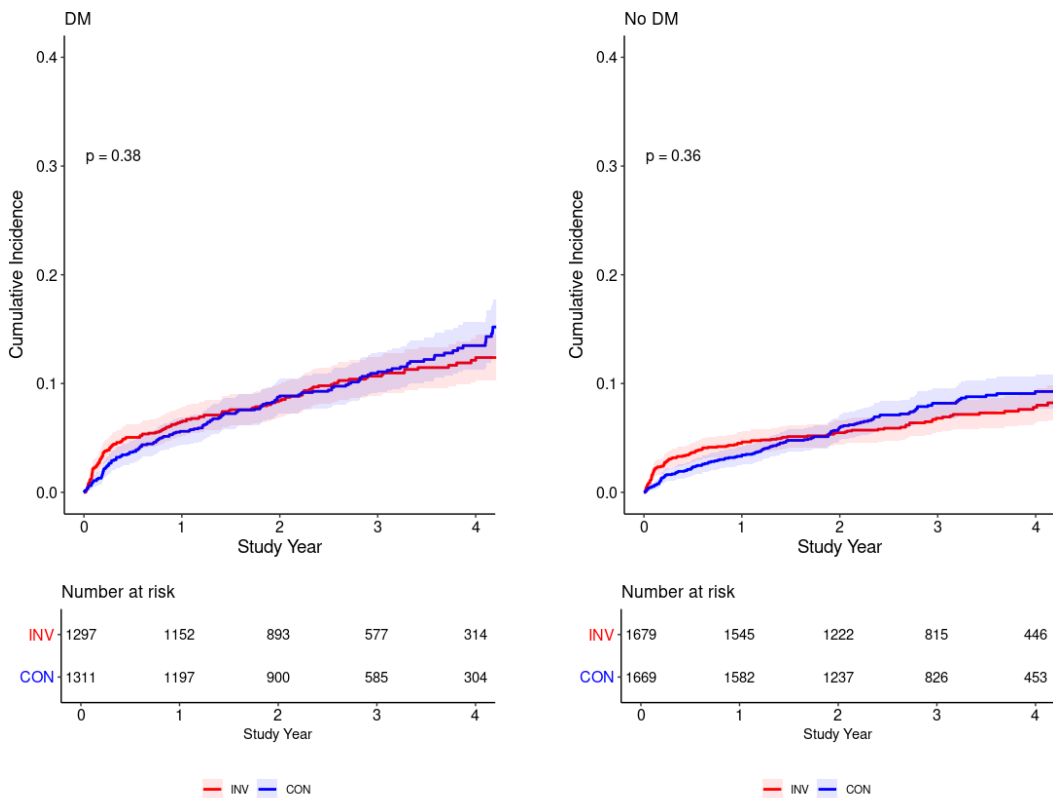

Figure VIIa. Kaplan-Meier estimate of cumulative event rates of death or MI by multivessel CAD  $\geq 50\%$  stenosis, stratified by diabetes status

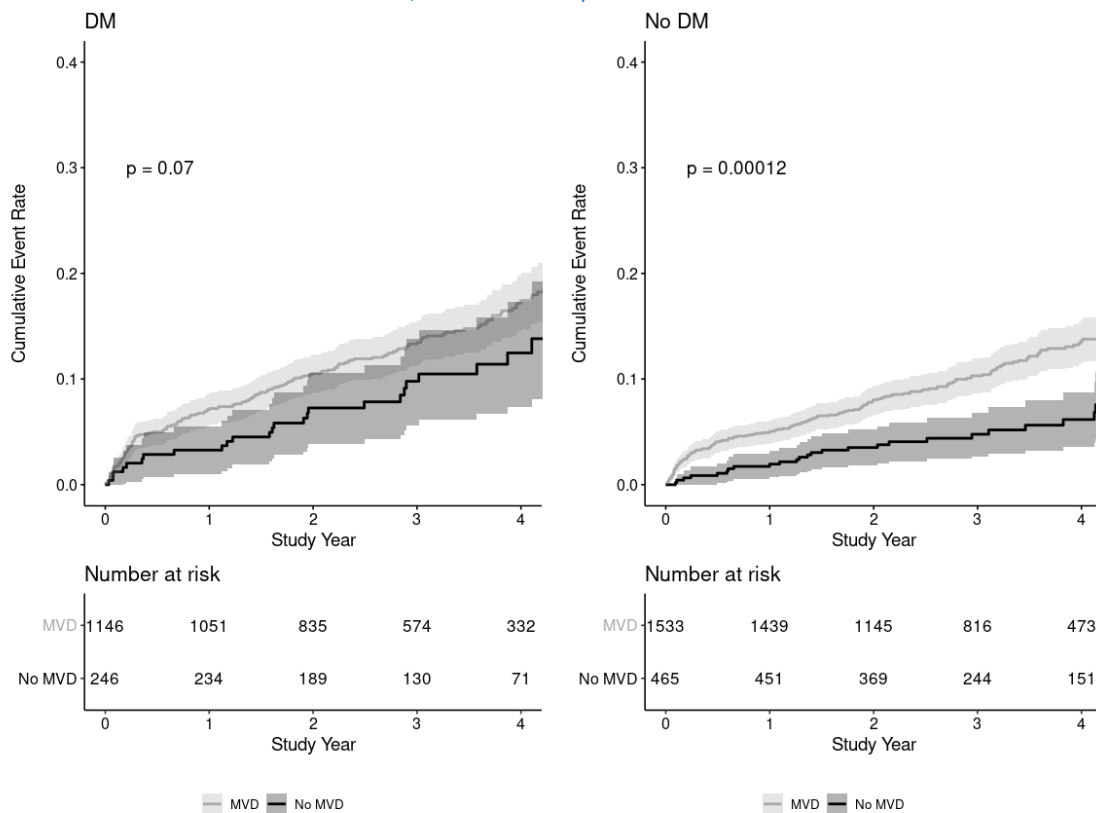

Figure VIIb. Kaplan-Meier estimate of cumulative event rates of death or MI by Duke score 6 severity of CAD, stratified by diabetes status

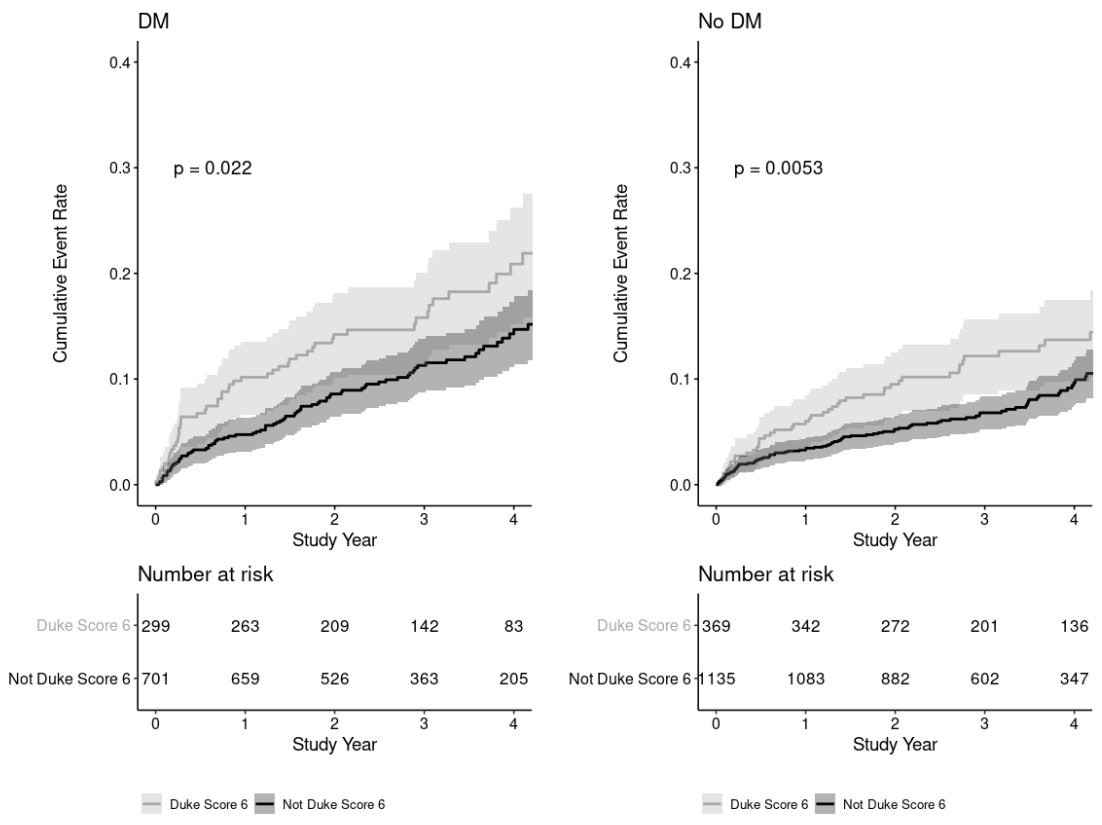



Figure VIIc. Kaplan-Meier estimate of cumulative event rates of death or MI by LVSD, stratified by diabetes status

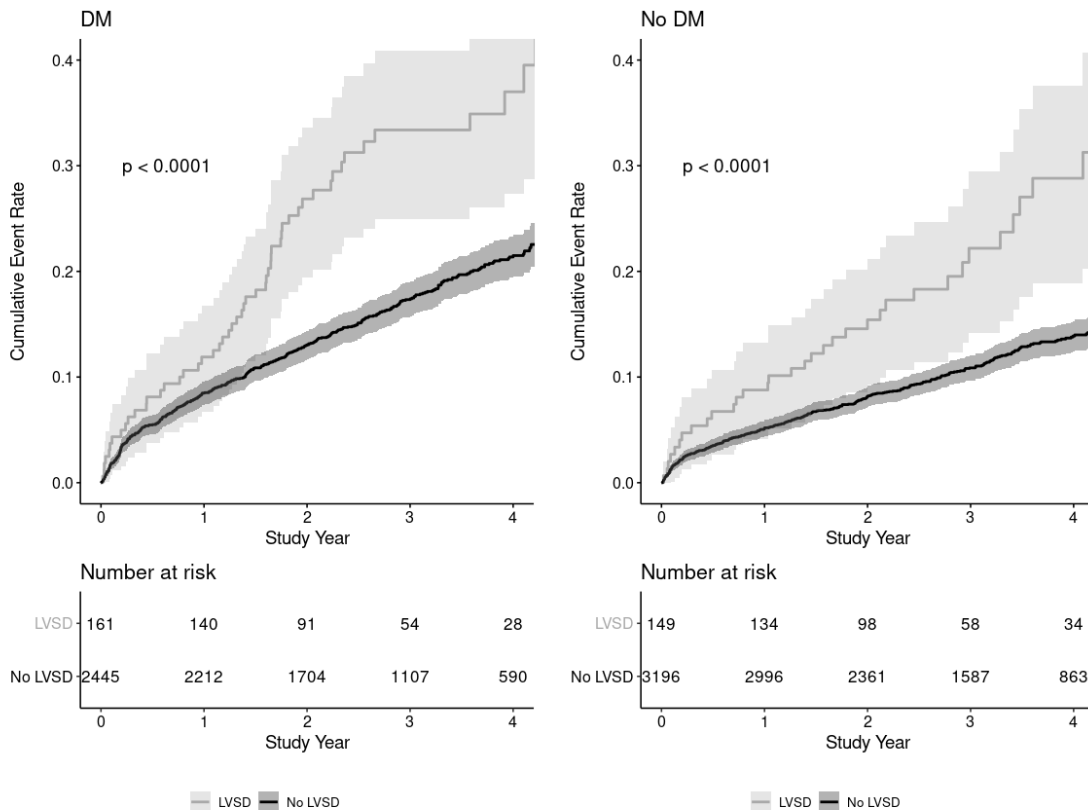

Figure VIIIa. Kaplan-Meier estimate of cumulative event rates of death or MI by treatment strategy, stratified by diabetes status and multivessel CAD  $\geq 50\%$  stenosis

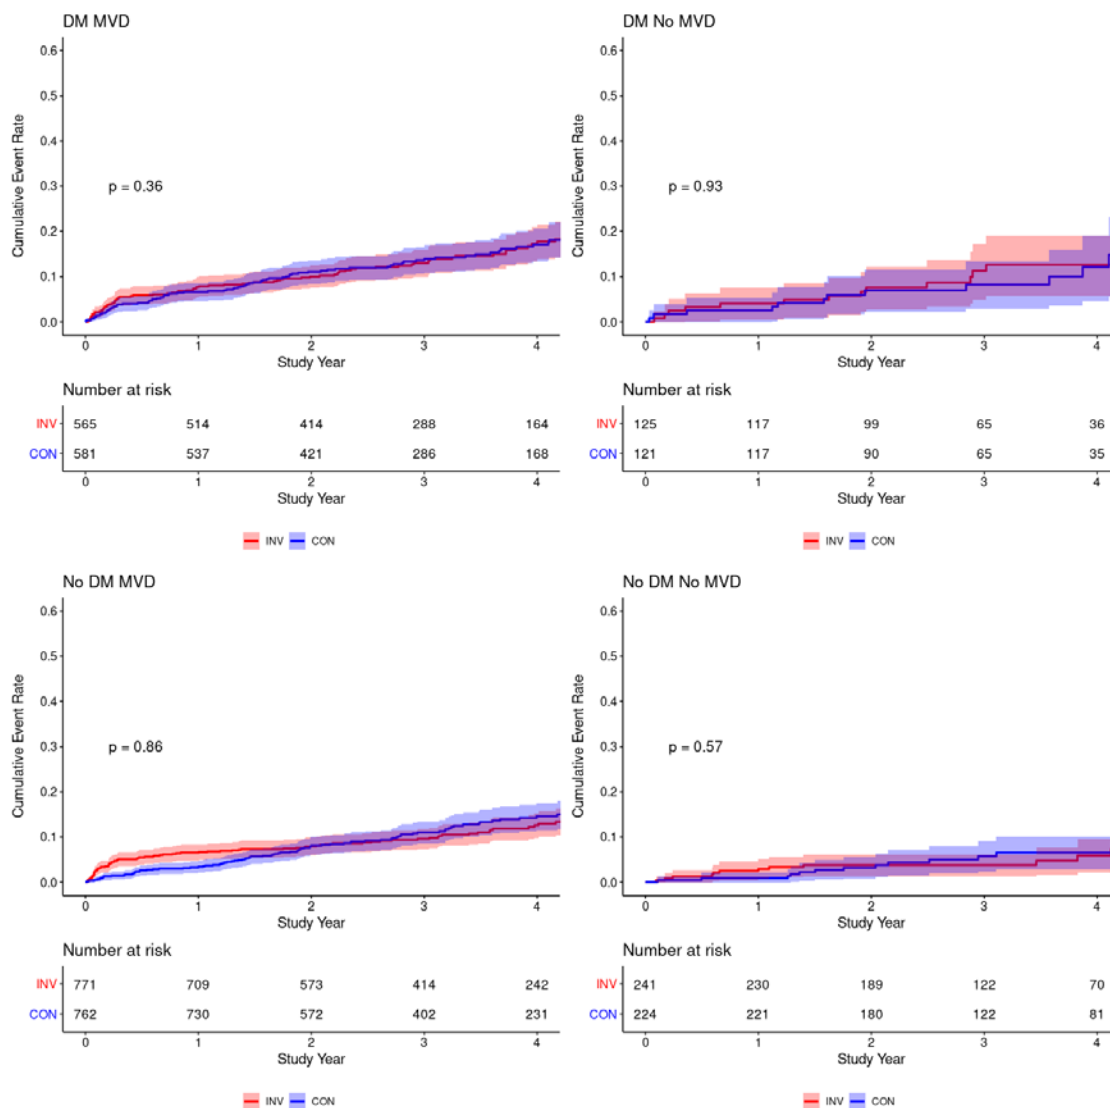

Figure VIIIb. Kaplan-Meier estimate of cumulative event rates of death or MI by treatment strategy, stratified by diabetes status and Duke score 6 severity of CAD

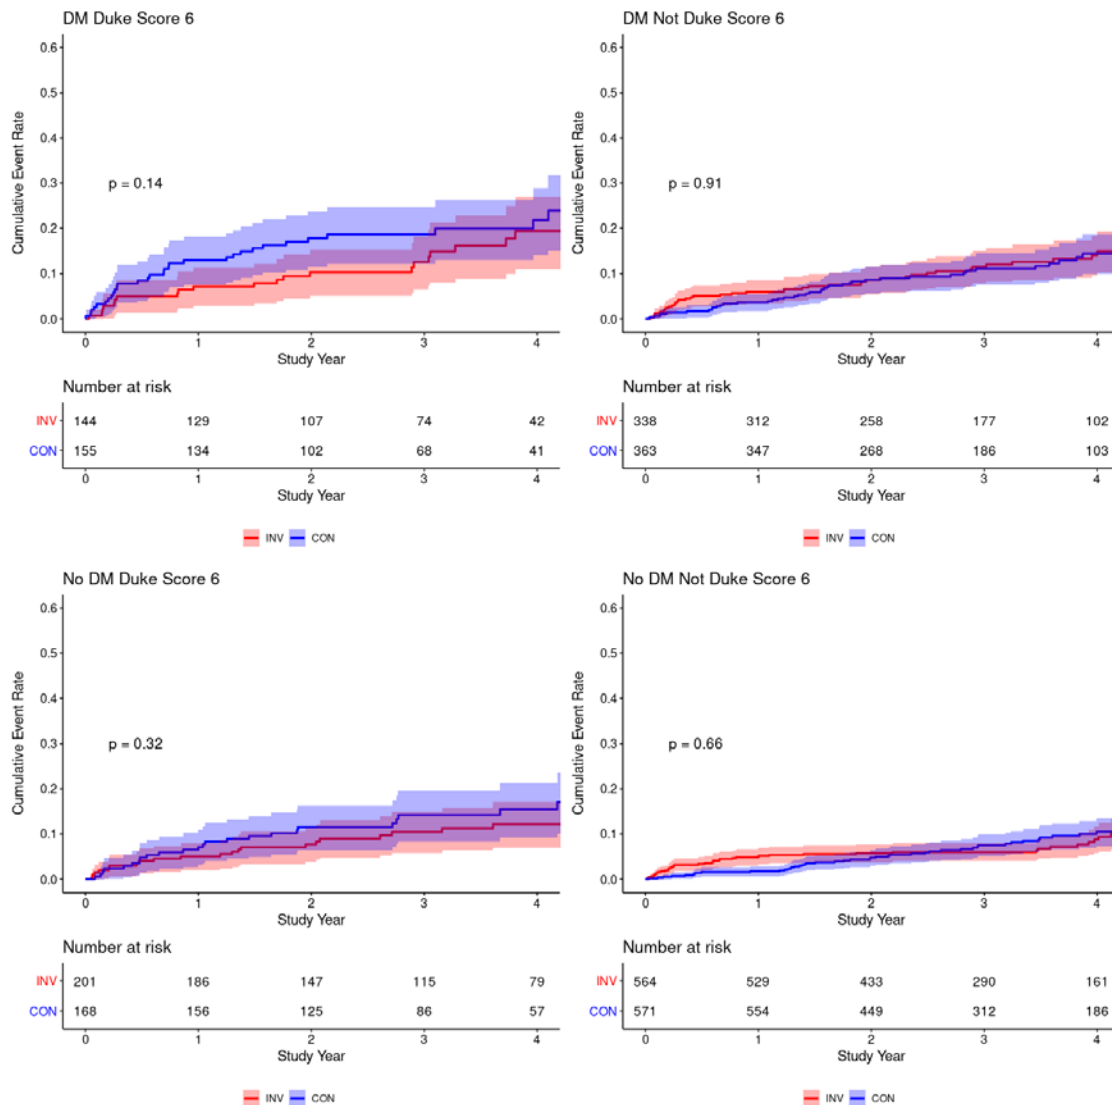

Figure VIIIc. Kaplan-Meier estimate of cumulative event rates of death or MI by treatment strategy, stratified by diabetes status and LVSD

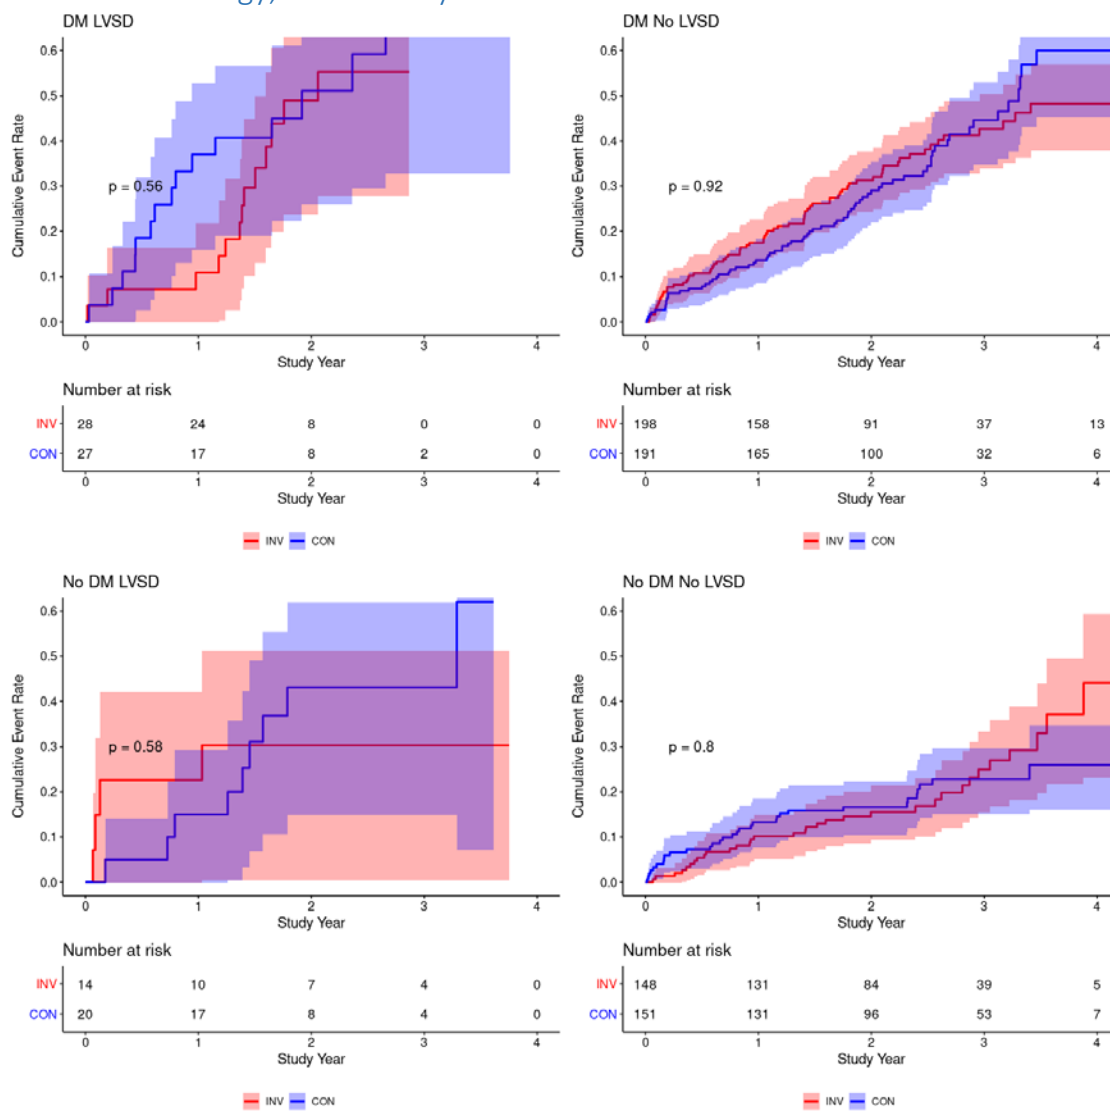

Figure IX. Diabetes anatomic features-specific treatment effects over study follow-up among the subset of ISCHEMIA participants with anatomic features. Color coding is by anatomic feature. Vertical gray bar is the overall treatment effect and the associated gray shading correspond to the 95% credible area. Vertical dashed red bar is at 1 for reference

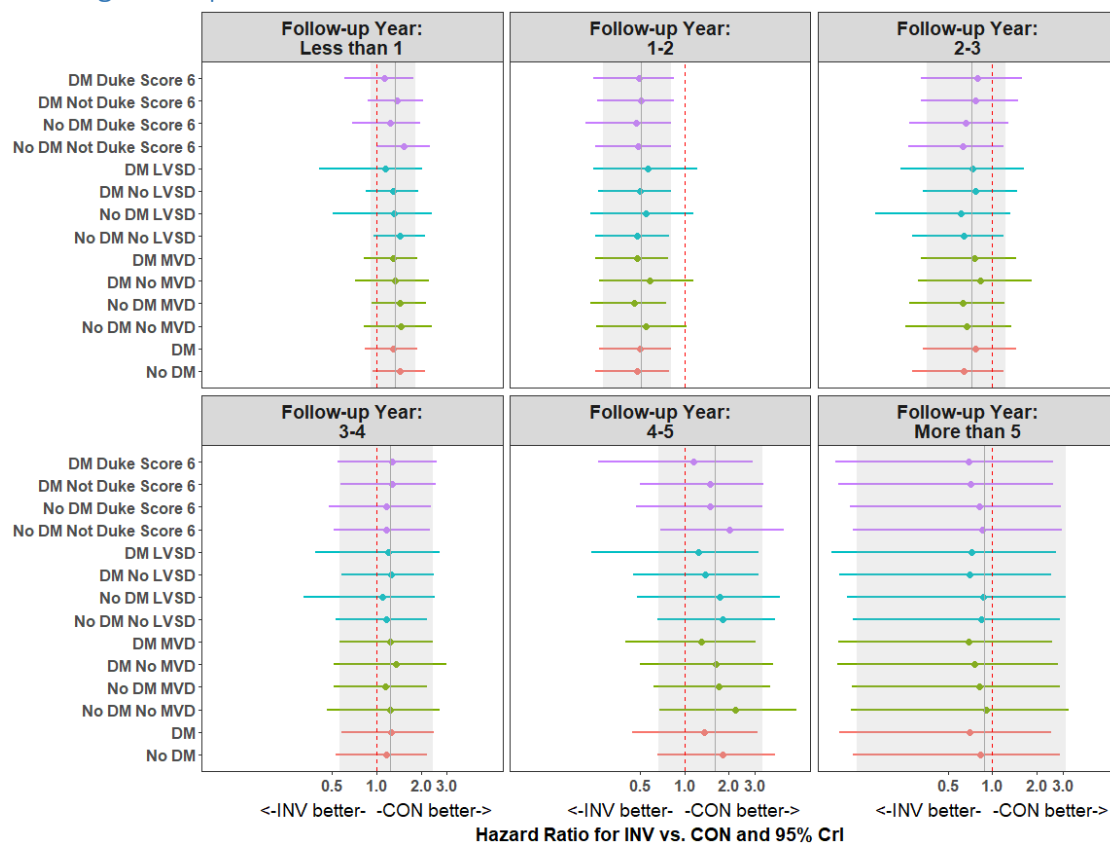

Figure X. Summary diabetes anatomic features-specific treatment effects based on proportional hazards among the subset of ISCHEMIA participants with anatomic features. Color coding is by anatomic feature. Vertical gray bar is the overall treatment effect and the associated gray shading correspond to the 95% credible area. Vertical dashed red bar is at 1 for reference

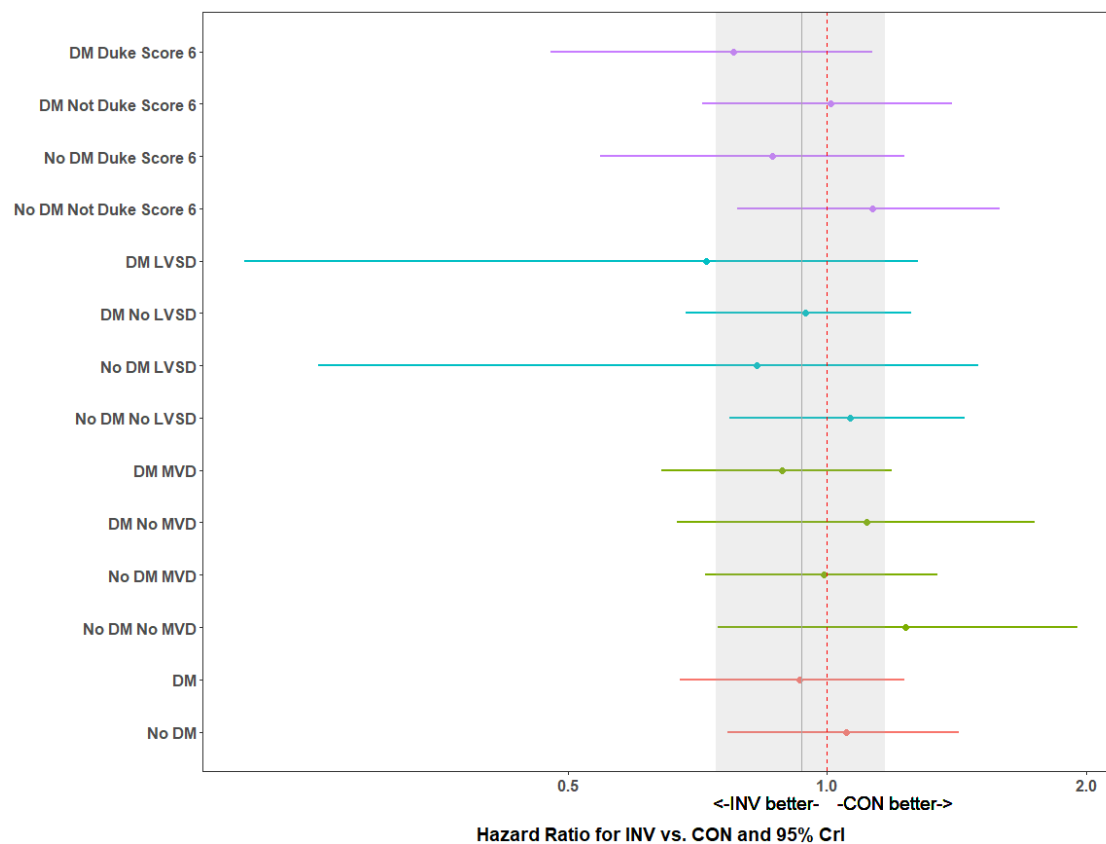

Figure 11a. Kaplan-Meier estimate of cumulative event rates of death by treatment strategy, stratified by diabetes status and multivessel CAD  $\geq 50\%$  stenosis

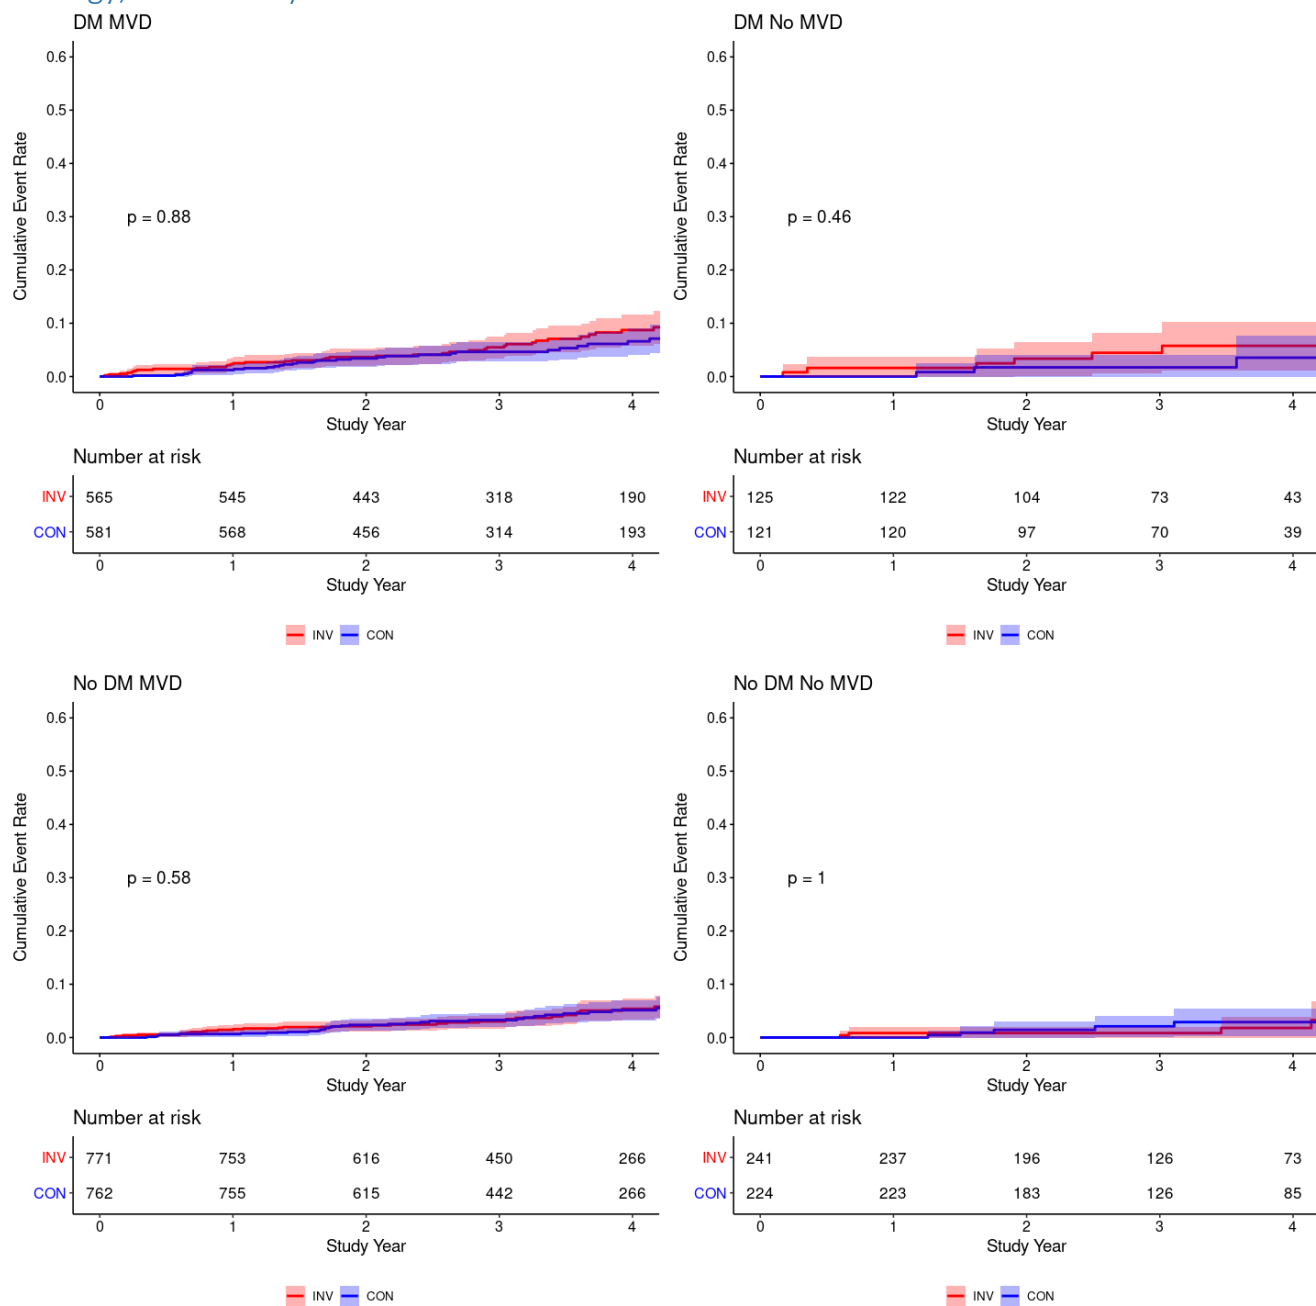

Figure X1b. Kaplan-Meier estimate of cumulative event rates of death by treatment strategy, stratified by diabetes status and Duke score 6 severity of CAD

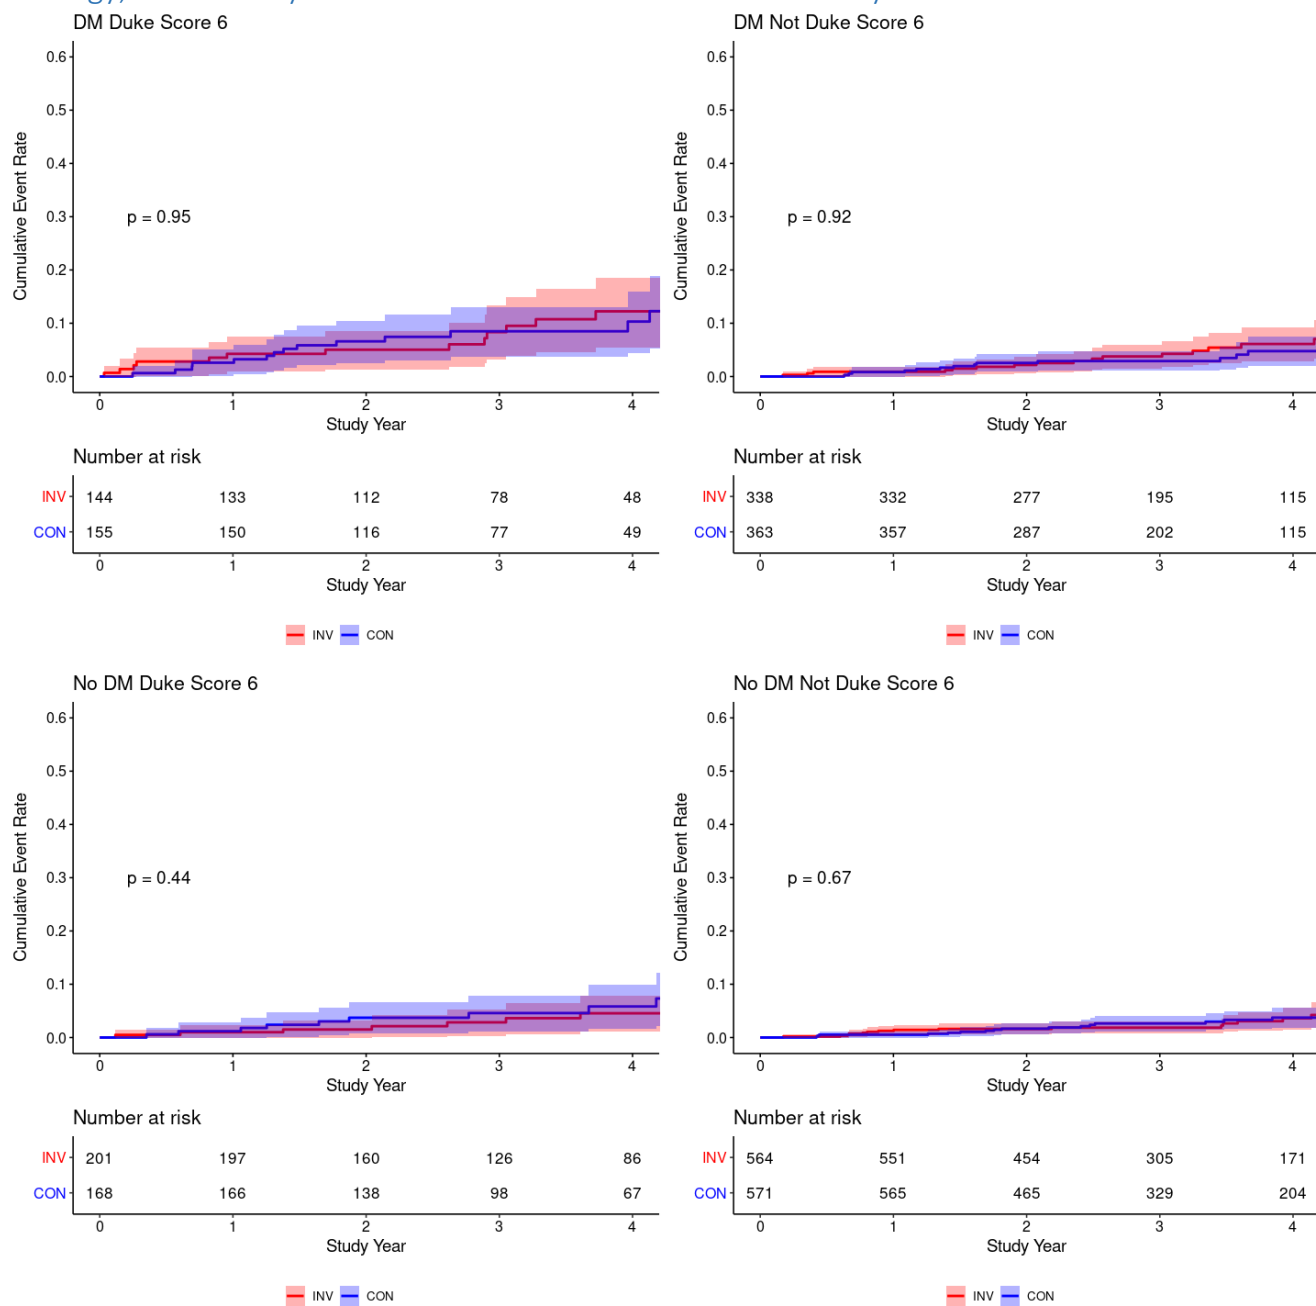



Figure X1c. Kaplan-Meier estimate of cumulative event rates of death by treatment strategy, stratified by diabetes status and LVSD

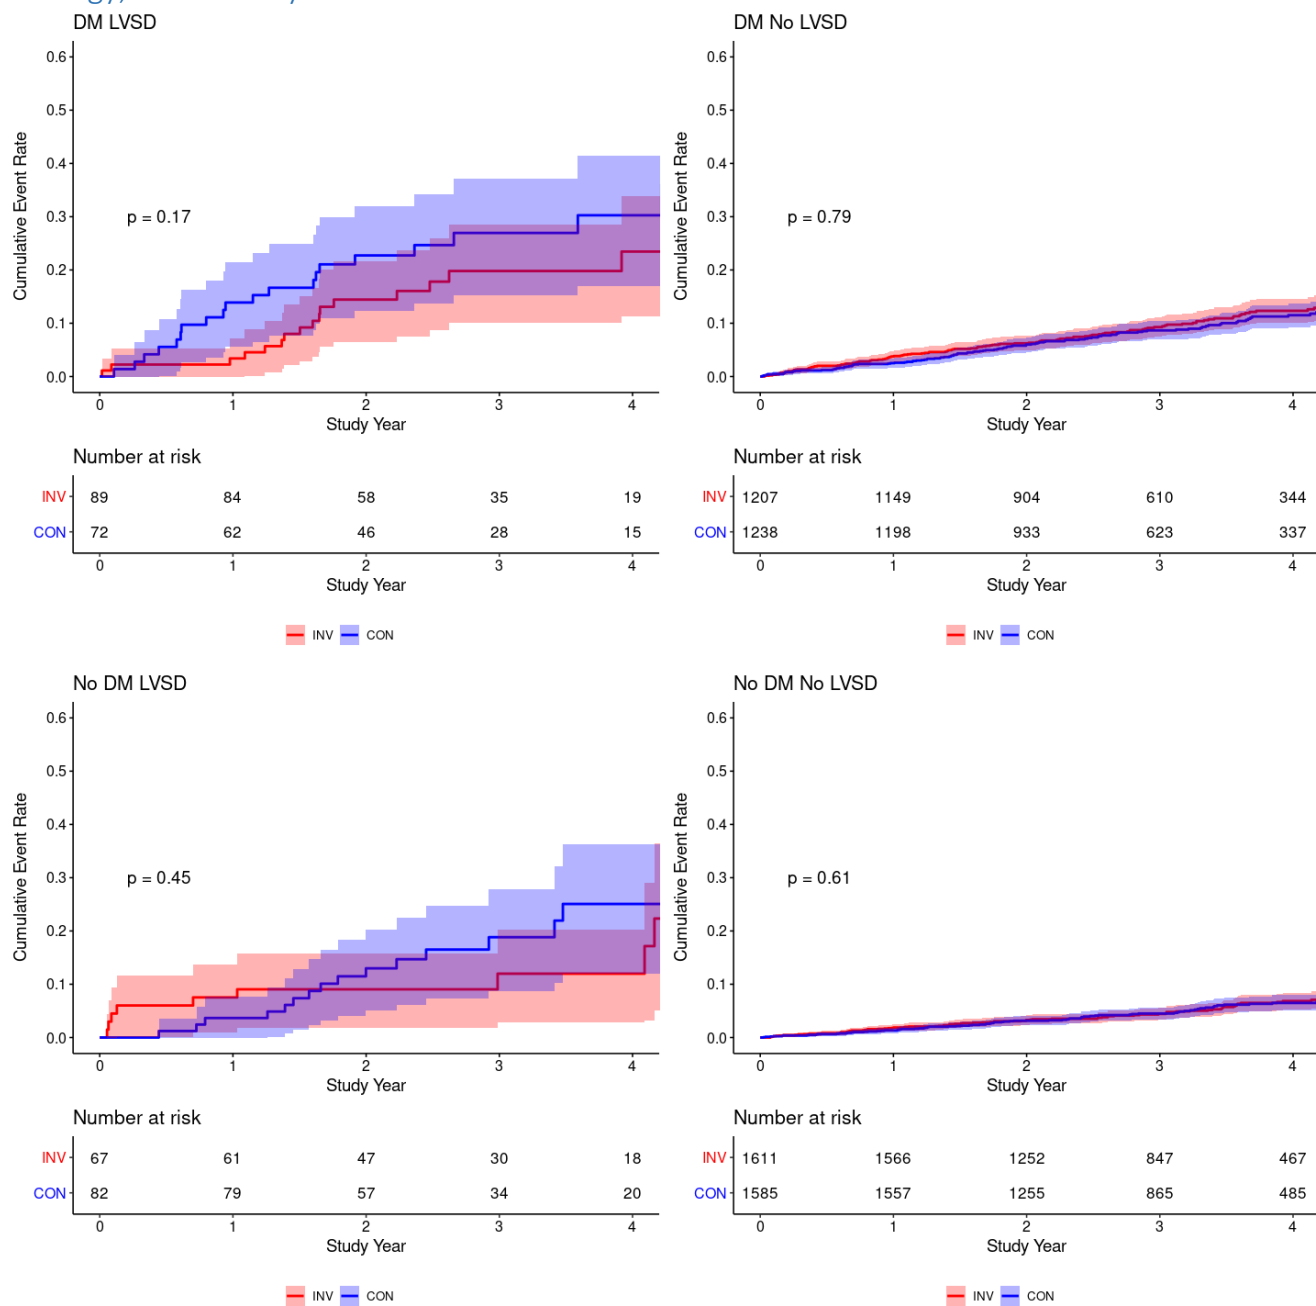

Figure XIIa. Cumulative incidence of CV death (accounting for competing risks) by treatment strategy, stratified by diabetes status and multivessel CAD  $\geq 50\%$  stenosis

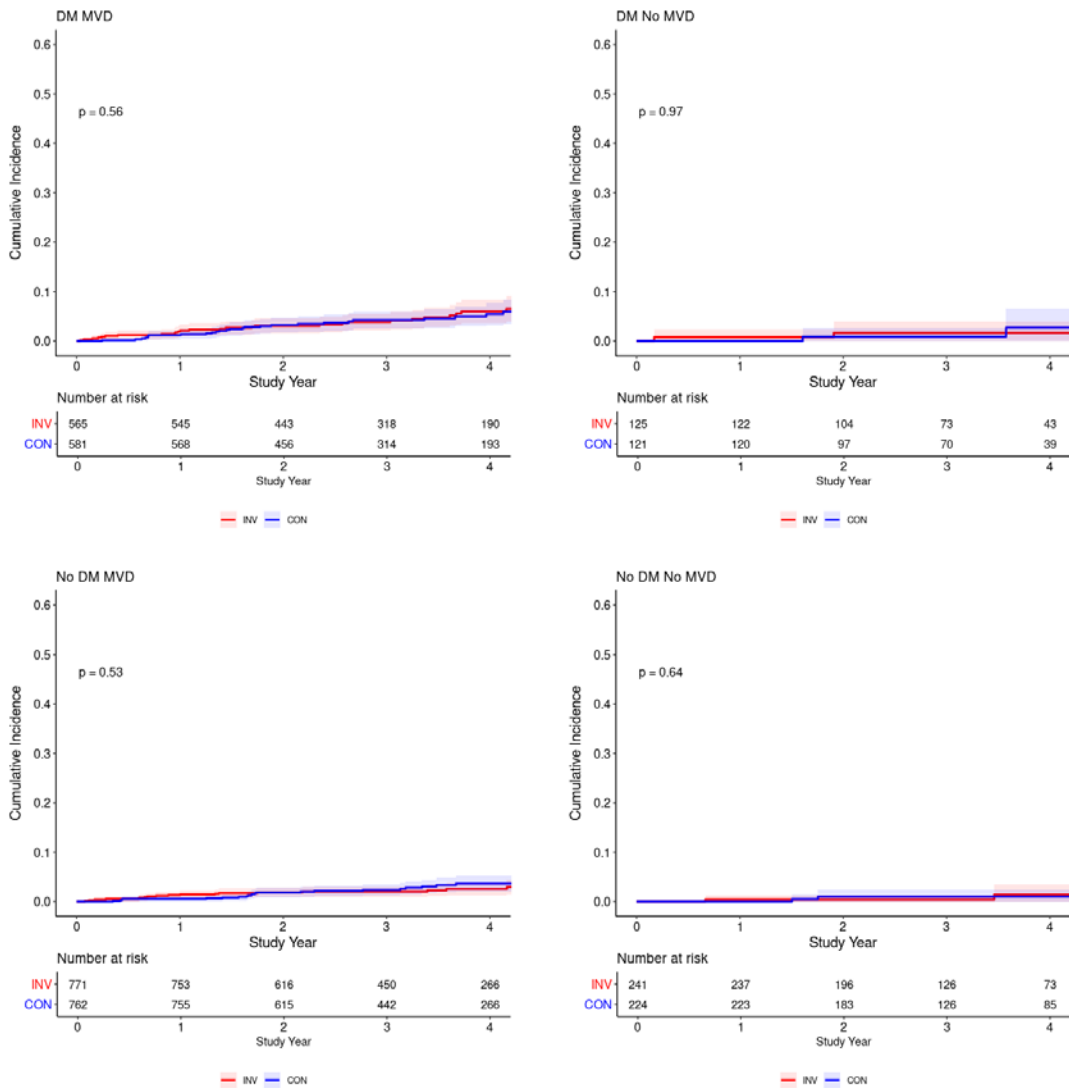

Figure XIIb. Cumulative incidence of CV death (accounting for competing risks) by treatment strategy, stratified by diabetes status and Duke score 6 severity of CAD

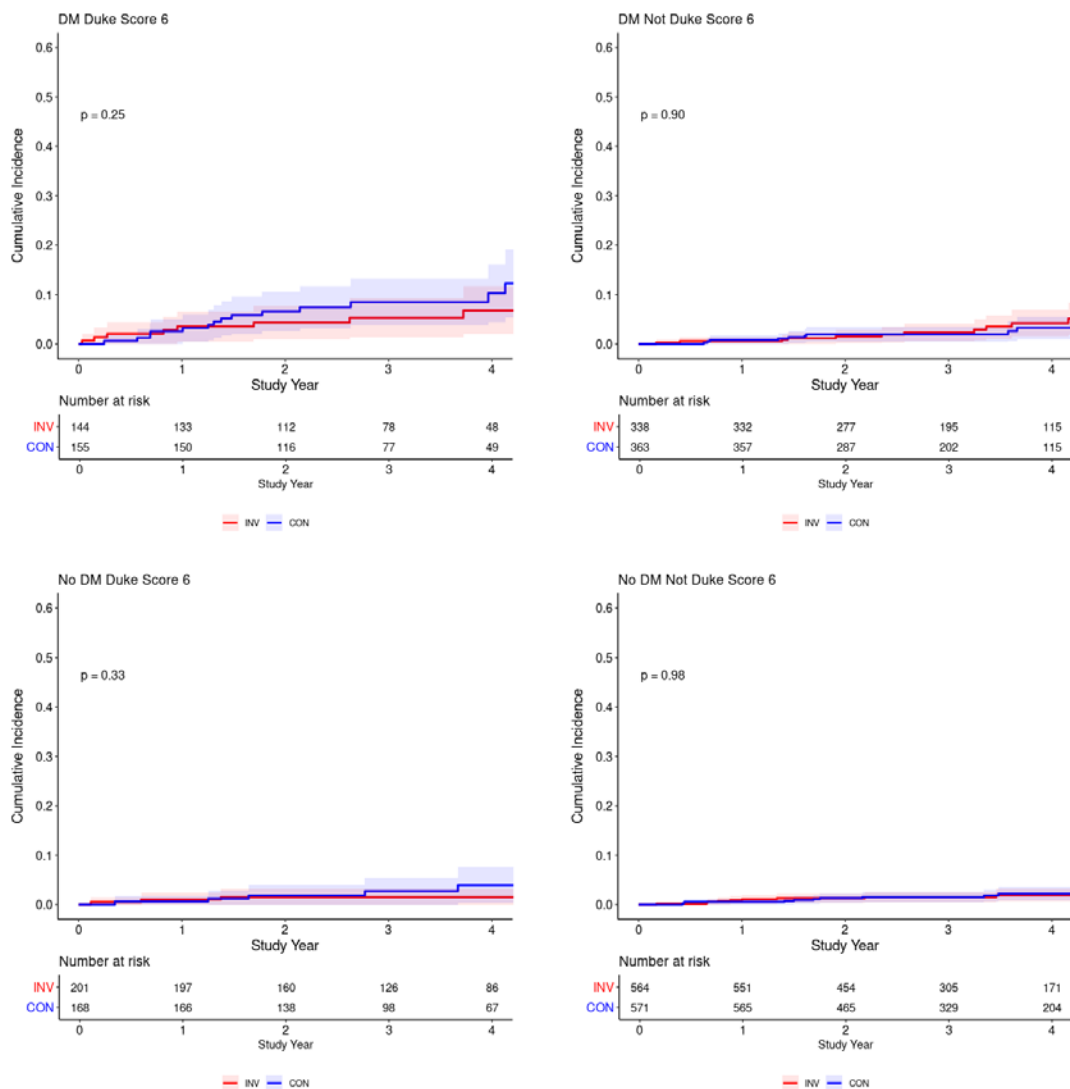

Figure XIIC. Cumulative incidence of CV death (accounting for competing risks) by treatment strategy, stratified by diabetes status and LVSD

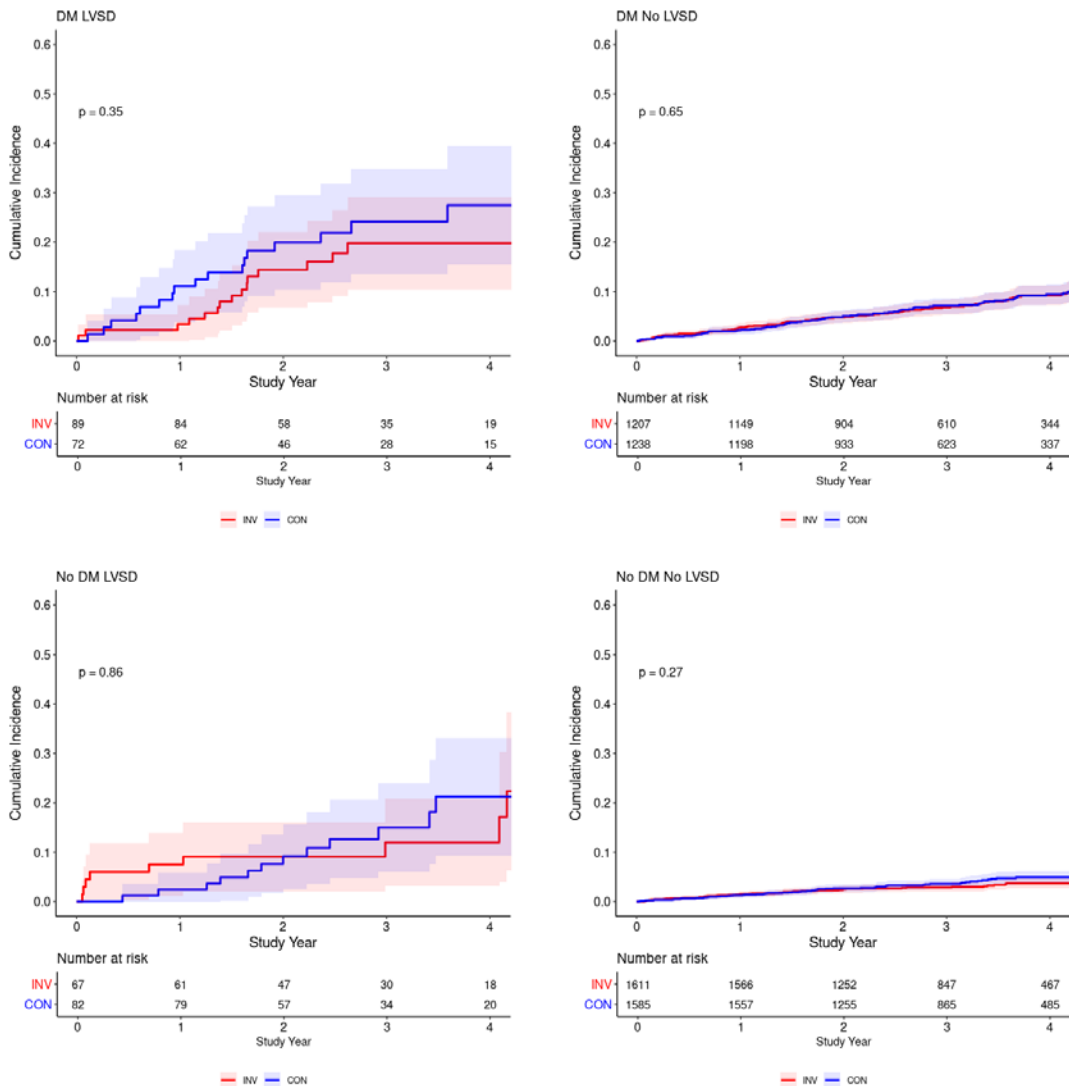

Figure XIIIa. Cumulative incidence of non-CV death (accounting for competing risks) by treatment strategy, stratified by diabetes status and multivessel CAD  $\geq 50\%$  stenosis

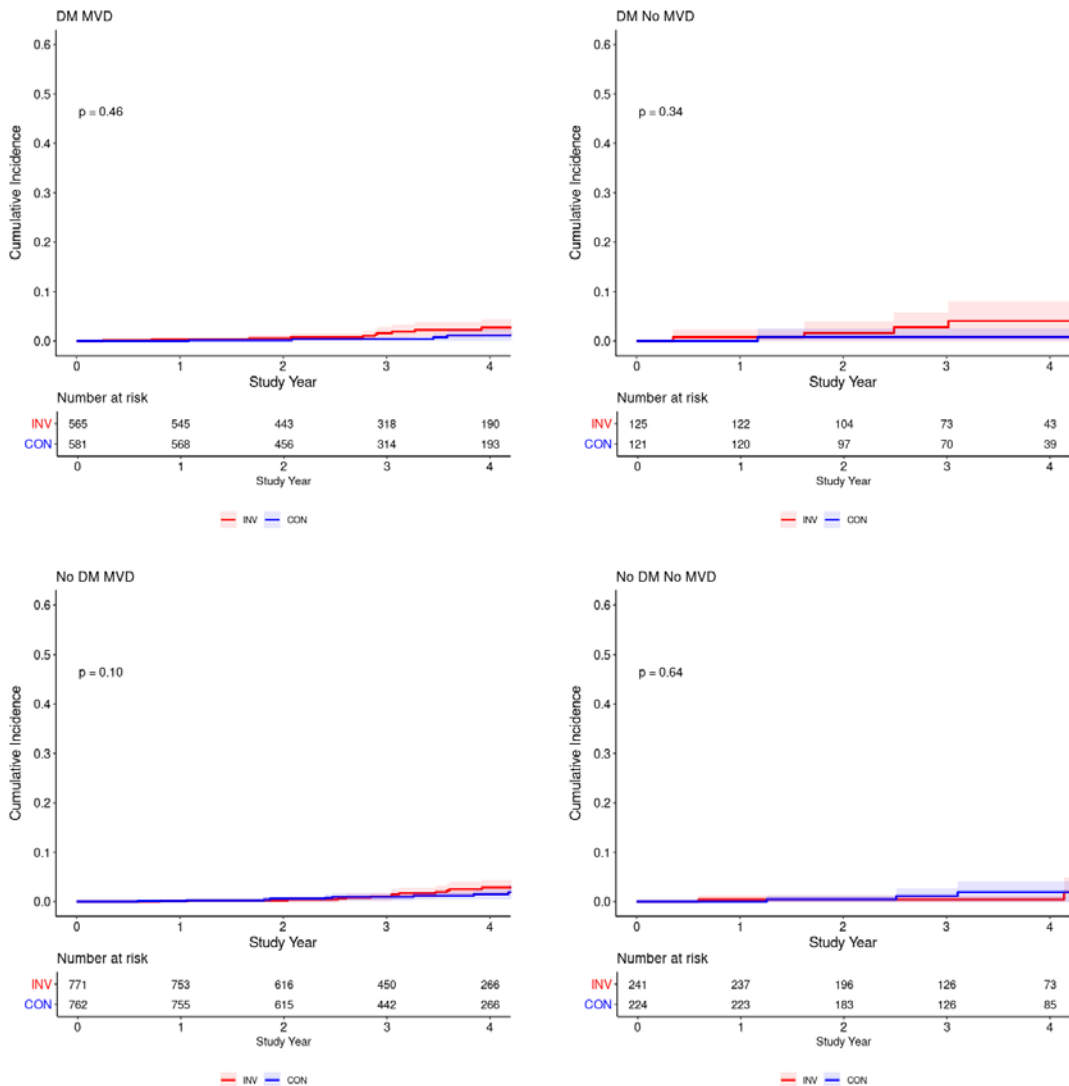

Figure XIIIb. Cumulative incidence of non-CV death (accounting for competing risks) by treatment strategy, stratified by diabetes status and Duke score 6 severity of CAD

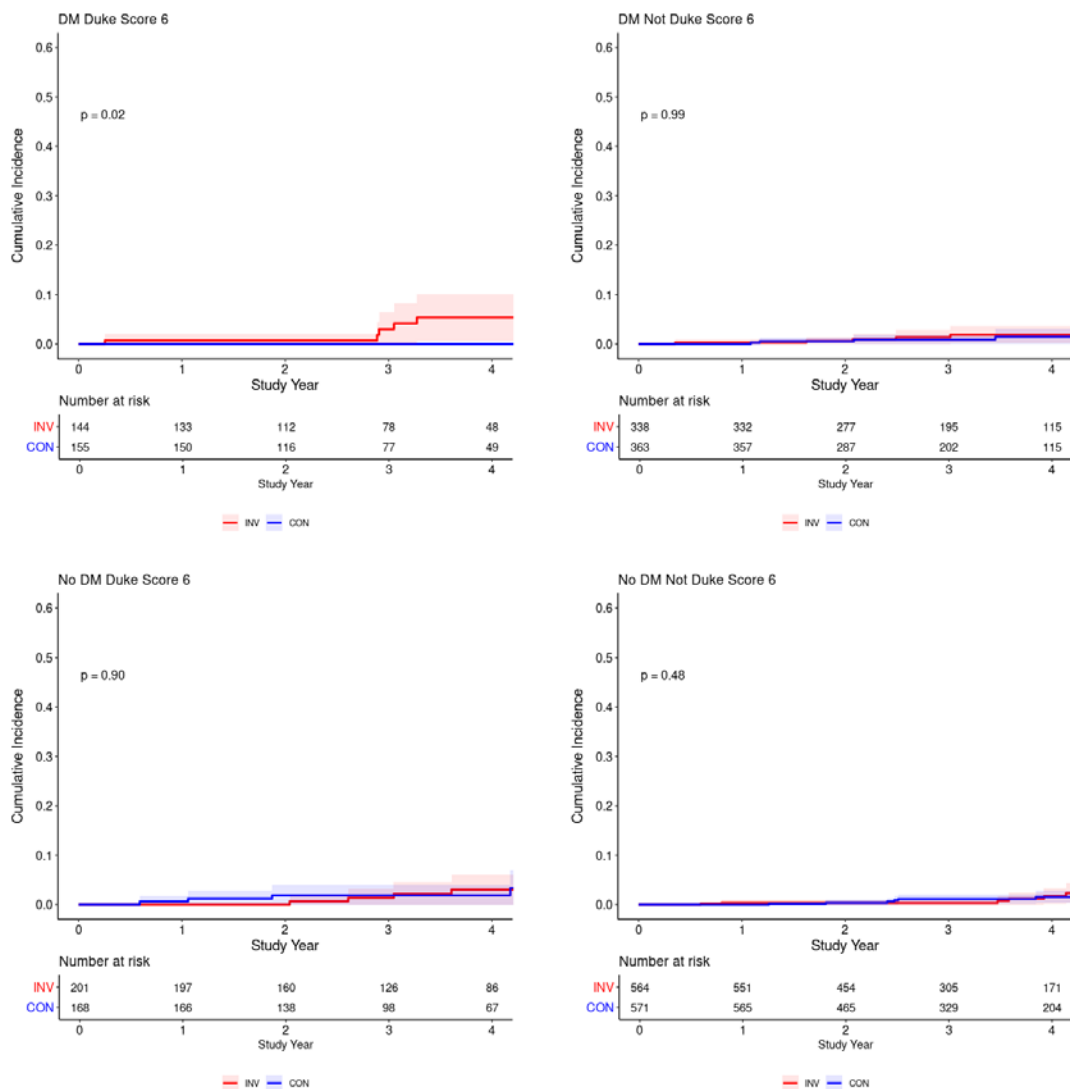

Figure XIIIc. Cumulative incidence of non-CV death (accounting for competing risks) by treatment strategy, stratified by diabetes status and LVSD

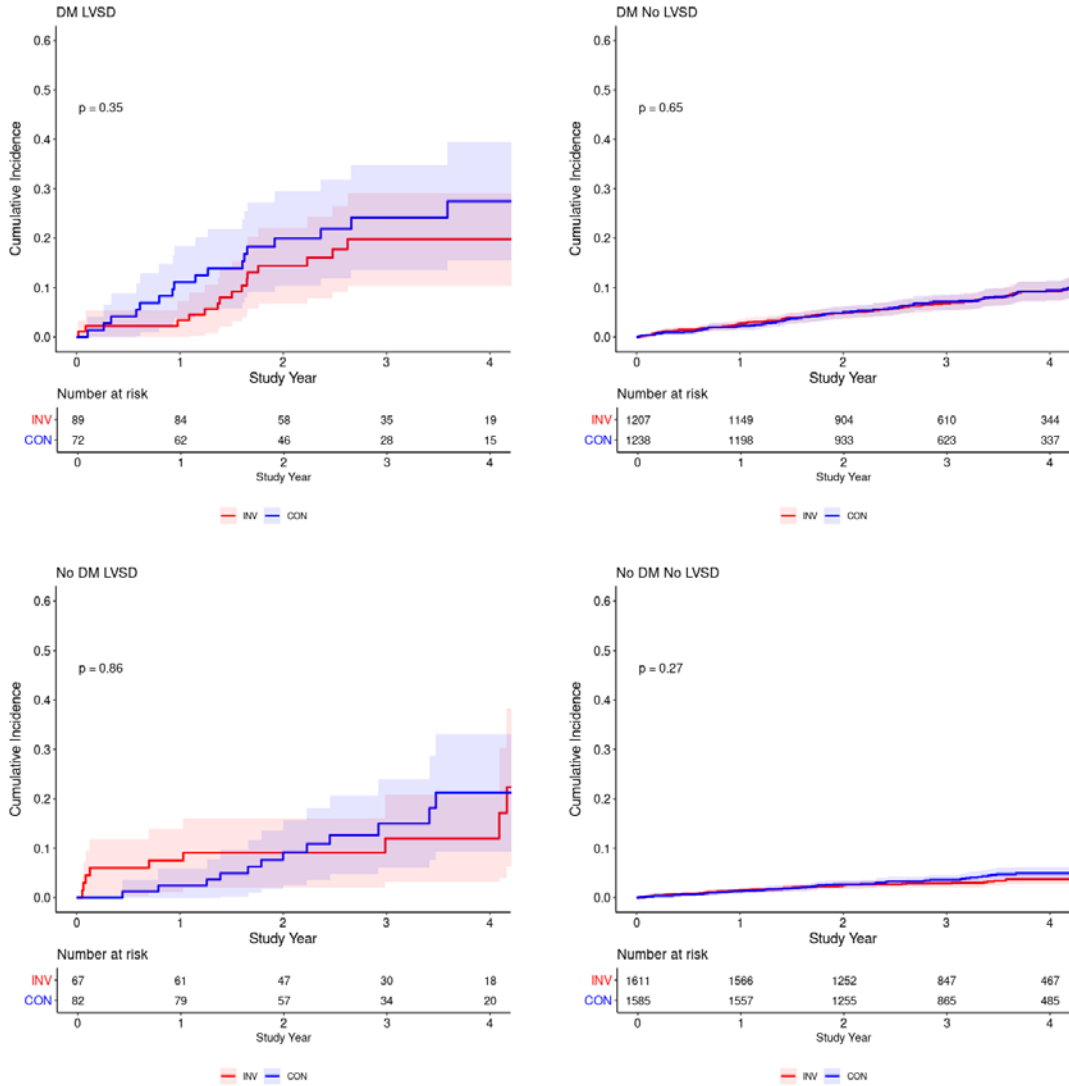

Figure XIVa. Cumulative incidence of MI (accounting for competing risks) by treatment strategy, stratified by diabetes status and multivessel CAD  $\geq 50\%$  stenosis

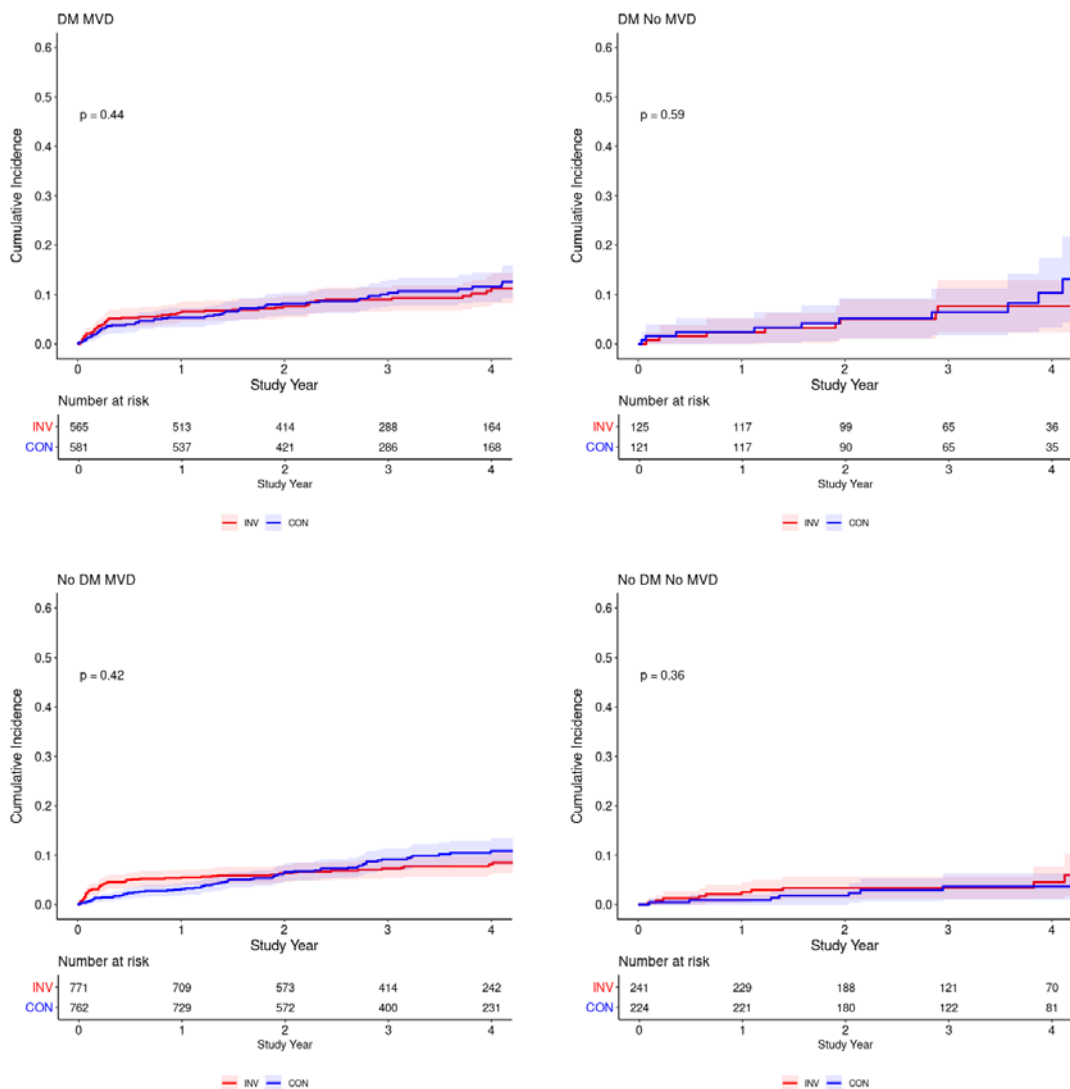



Figure XIVb. Cumulative incidence of MI (accounting for competing risks) by treatment strategy, stratified by diabetes status and Duke score 6 severity of CAD

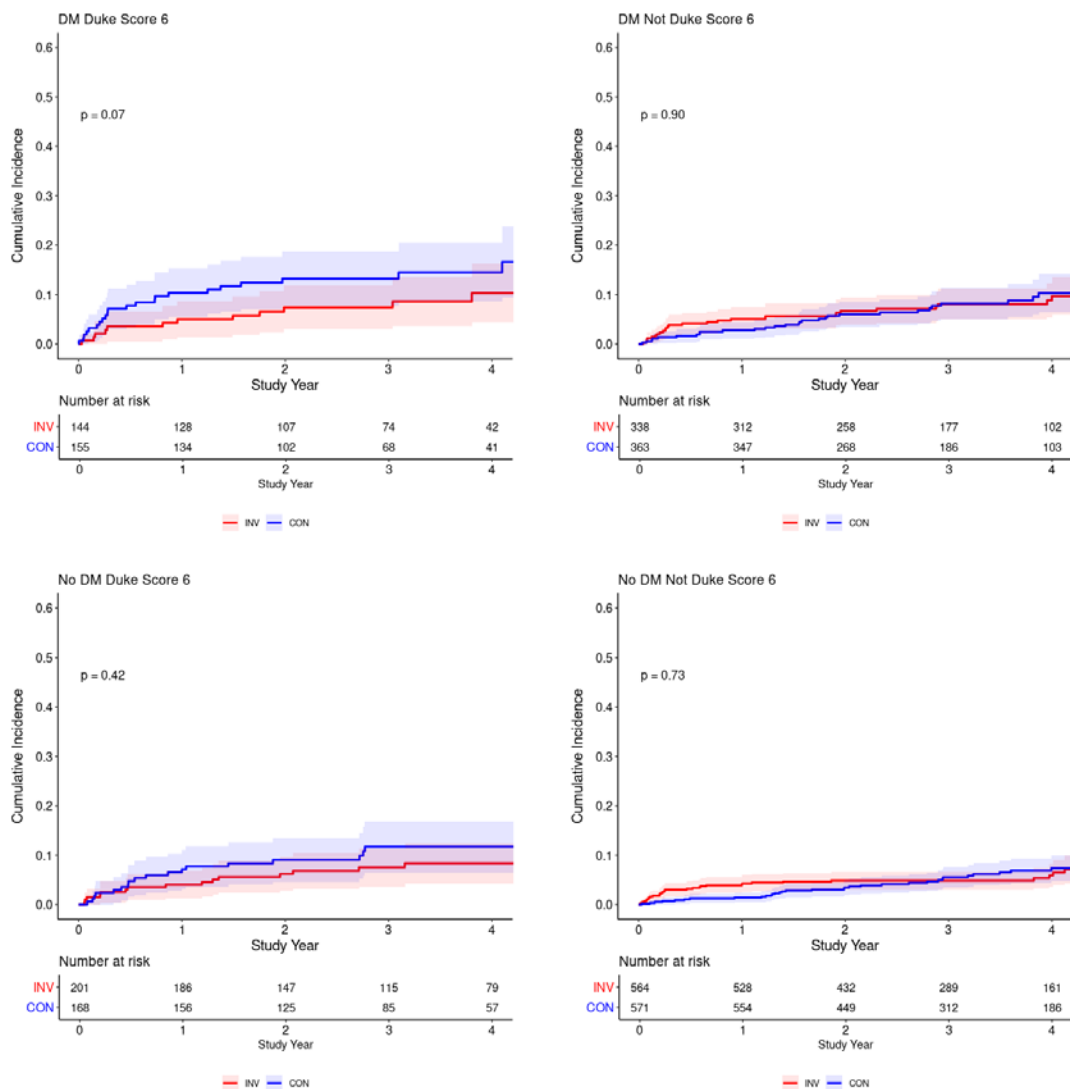

Figure XIVc. Cumulative incidence of MI (accounting for competing risks) by treatment strategy, stratified by diabetes status and LVSD

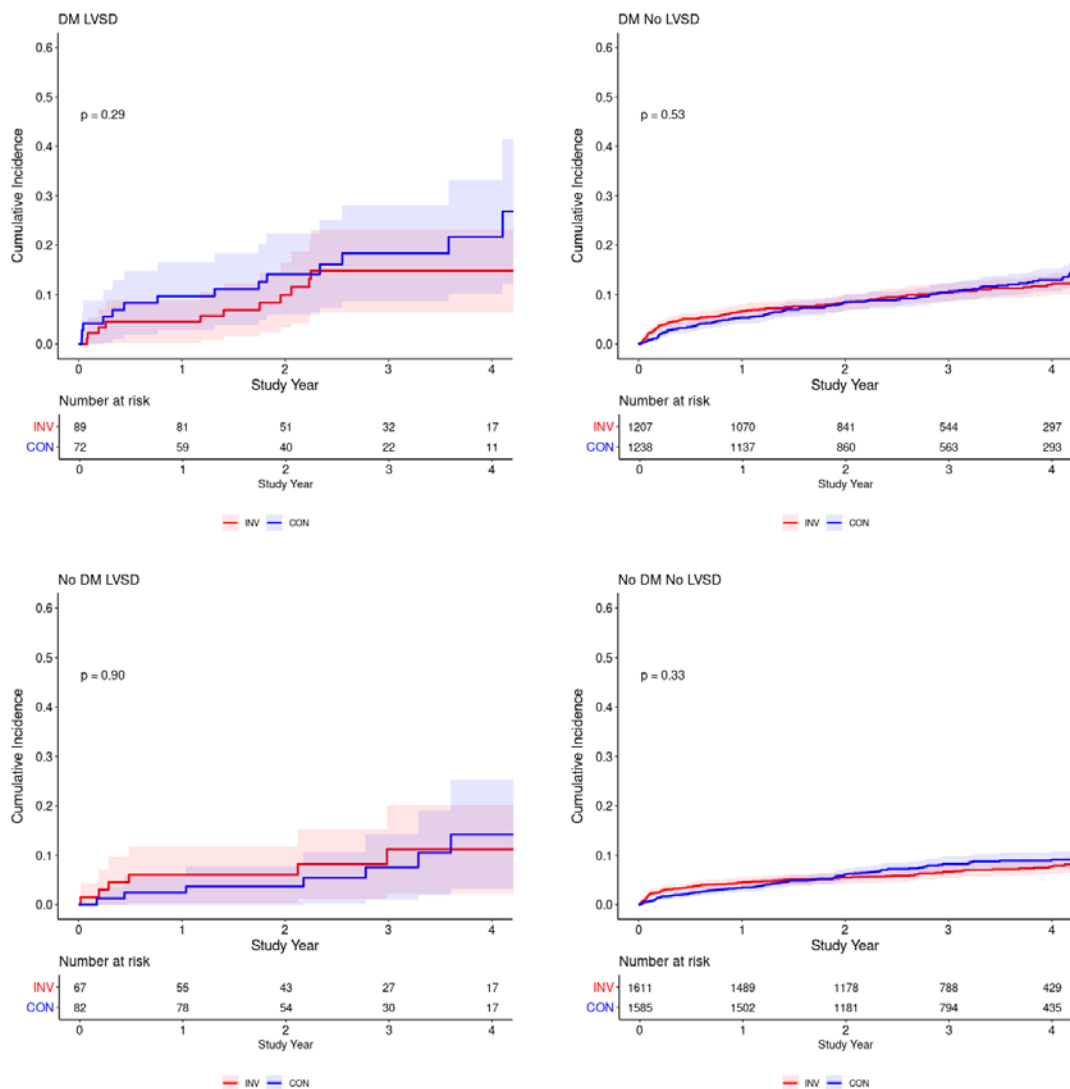

Supplement: NIHMS1739854-supplement-Supplemental_Publication_Material.pdf [file NIHMS1739854-supplement-Supplemental_Publication_Material.pdf]
